# Supplementary material
Source: publisher site journal article supplement (https://www.dovepress.com/article/283489)
Supplement: Supplementary file 1 [file get_supplementary_file.php]

**Supplementary Tables**

**Table S1.** PRISMA-P Checklist

| **Section/topic** | **#** | **Checklist item** | **Reported on page #** |
| --- | --- | --- | --- |
| **TITLE** | | |  |
| Title | 1 | Identify the report as a systematic review, meta-analysis, or both. | 1 |
| **ABSTRACT** | | |  |
| Structured summary | 2 | Provide a structured summary including, as applicable: background; objectives; data sources; study eligibility criteria, participants, and interventions; study appraisal and synthesis methods; results; limitations; conclusions and implications of key findings; systematic review registration number. | 2, 3 |
| **INTRODUCTION** | | |  |
| Rationale | 3 | Describe the rationale for the review in the context of what is already known. | 4 |
| Objectives | 4 | Provide an explicit statement of questions being addressed with reference to participants, interventions, comparisons, outcomes, and study design (PICOS). | 4 |
| **METHODS** | | |  |
| Protocol and registration | 5 | Indicate if a review protocol exists, if and where it can be accessed (e.g., Web address), and, if available, provide registration information including registration number. | 5 |
| Eligibility criteria | 6 | Specify study characteristics (e.g., PICOS, length of follow-up) and report characteristics (e.g., years considered, language, publication status) used as criteria for eligibility, giving rationale. | 5, 6 |
| Information sources | 7 | Describe all information sources (e.g., databases with dates of coverage, contact with study authors to identify additional studies) in the search and date last searched. | 5 |
| Search | 8 | Present full electronic search strategy for at least one database, including any limits used, such that it could be repeated. | 5, 6 |
| Study selection | 9 | State the process for selecting studies (i.e., screening, eligibility, included in systematic review, and, if applicable, included in the meta-analysis). | 5, Figure 1 |
| Data collection process | 10 | Describe method of data extraction from reports (e.g., piloted forms, independently, in duplicate) and any processes for obtaining and confirming data from investigators. | 4 |
| Data items | 11 | List and define all variables for which data were sought (e.g., PICOS, funding sources) and any assumptions and simplifications made. | 4-5 |
| Risk of bias in individual studies | 12 | Describe methods used for assessing risk of bias of individual studies (including specification of whether this was done at the study or outcome level), and how this information is to be used in any data synthesis. | 6, 7 |
| Summary measures | 13 | State the principal summary measures (e.g., risk ratio, difference in means). | 7, 8 |
| Synthesis of results | 14 | Describe the methods of handling data and combining results of studies, if done, including measures of consistency (e.g., I2) for each meta-analysis. | 7, 8 |
| Risk of bias across studies | 15 | Specify any assessment of risk of bias that may affect the cumulative evidence (e.g., publication bias, selective reporting within studies). | 8, 9 |
| Additional analyses | 16 | Describe methods of additional analyses (e.g., sensitivity or subgroup analyses, meta-regression), if done, indicating which were pre-specified. | 7, 8 |
| **RESULTS** | | |  |
| Study selection | 17 | Give numbers of studies screened, assessed for eligibility, and included in the review, with reasons for exclusions at each stage, ideally with a flow diagram. | 9, 10 |
| Study characteristics | 18 | For each study, present characteristics for which data were extracted (e.g., study size, PICOS, follow-up period) and provide the citations. | 9, 10, Table 1 |
| Risk of bias within studies | 19 | Present data on risk of bias of each study and, if available, any outcome level assessment (see item 12). | 12, Figure 5 |
| Results of individual studies | 20 | For all outcomes considered (benefits or harms), present, for each study: (a) simple summary data for each intervention group (b) effect estimates and confidence intervals, ideally with a forest plot. | Figure 2 - 4 |
| Synthesis of results | 21 | Present results of each meta-analysis done, including confidence intervals and measures of consistency. | Page 9 – 12, Figure 2 - 4 |
| Risk of bias across studies | 22 | Present results of any assessment of risk of bias across studies (see Item 15). | 12 |
| Additional analysis | 23 | Give results of additional analyses, if done (e.g., sensitivity or subgroup analyses, meta-regression [see Item 16]). | 10 - 12 |
| **DISCUSSION** | | |  |
| Summary of evidence | 24 | Summarize the main findings including the strength of evidence for each main outcome; consider their relevance to key groups (e.g., healthcare providers, users, and policy makers). | 12, 13 |
| Limitations | 25 | Discuss limitations at study and outcome level (e.g., risk of bias), and at review-level (e.g., incomplete retrieval of identified research, reporting bias). | 13 - 15 |
| Conclusions | 26 | Provide a general interpretation of the results in the context of other evidence, and implications for future research. | 15, 16 |
| **FUNDING** | | |  |
| Funding | 27 | Describe sources of funding for the systematic review and other support (e.g., supply of data); role of funders for the systematic review. | 16 |

*From:* Moher D, Liberati A, Tetzlaff J, Altman DG, The PRISMA Group (2009). Preferred Reporting Items for Systematic Reviews and Meta-Analyses: The PRISMA Statement. PLoS Med 6(6): e1000097. doi:10.1371/journal.pmed1000097.6

PRISMA-P: Preferred Reporting Items for Systematic Reviews and Meta-Analyses-Protocols.

**Table S2.** Literature search terms used for OVID MEDLINE. The final search strategy applied to conduct this pairwise meta-analysis is reported at step #30. The summary text of the identified records is shown in Appendix 1.

| **#** | **Search strategy** |
| --- | --- |
| 1 | Beclomethasone*.mp. [mp=ti, ab, ot, nm, hw, fx, kf, ox, px, rx, ui, sy] |
| 2 | Formoterol*.mp. [mp=ti, ab, ot, nm, hw, fx, kf, ox, px, rx, ui, sy] |
| 3 | Glycopyrronium*.mp. [mp=ti, ab, ot, nm, hw, fx, kf, ox, px, rx, ui, sy] |
| 4 | CHF 5993.mp. [mp=ti, ab, ot, nm, hw, fx, kf, ox, px, rx, ui, sy] |
| 5 | CHF5993.mp. [mp=ti, ab, ot, nm, hw, fx, kf, ox, px, rx, ui, sy] |
| 6 | Fluticasone furoate*.mp. [mp=ti, ab, ot, nm, hw, fx, kf, ox, px, rx, ui, sy] |
| 7 | Vilanterol*.mp. [mp=ti, ab, ot, nm, hw, fx, kf, ox, px, rx, ui, sy] |
| 8 | Umeclidinium*.mp. [mp=ti, ab, ot, nm, hw, fx, kf, ox, px, rx, ui, sy] |
| 9 | Mometasone*.mp. [mp=ti, ab, ot, nm, hw, fx, kf, ox, px, rx, ui, sy] |
| 10 | Indacaterol*.mp. [mp=ti, ab, ot, nm, hw, fx, kf, ox, px, rx, ui, sy] |
| 11 | QVM149.mp. [mp=ti, ab, ot, nm, hw, fx, kf, ox, px, rx, ui, sy] |
| 12 | QVM 149.mp. [mp=ti, ab, ot, nm, hw, fx, kf, ox, px, rx, ui, sy] |
| 13 | Fluticasone propionate*.mp. [mp=ti, ab, ot, nm, hw, fx, kf, ox, px, rx, ui, sy] |
| 14 | Salmeterol*.mp. [mp=ti, ab, ot, nm, hw, fx, kf, ox, px, rx, ui, sy] |
| 15 | Tiotropium*.mp. [mp=ti, ab, ot, nm, hw, fx, kf, ox, px, rx, ui, sy] |
| 16 | ICS*.mp. [mp=ti, ab, ot, nm, hw, fx, kf, ox, px, rx, ui, sy] |
| 17 | LABA*.mp. [mp=ti, ab, ot, nm, hw, fx, kf, ox, px, rx, ui, sy] |
| 18 | Triple*.mp. [mp=ti, ab, ot, nm, hw, fx, kf, ox, px, rx, ui, sy] |
| 19 | Asthma*.mp. [mp=ti, ab, ot, nm, hw, fx, kf, ox, px, rx, ui, sy] |
| 20 | 1 and 2 and 3 |
| 21 | 4 or 5 |
| 22 | 6 and 7 and 8 |
| 23 | 3 and 9 and 10 |
| 24 | 11 or 12 |
| 25 | 13 and 14 and 15 |
| 26 | 15 and 16 and 17 |
| 27 | 20 or 21 |
| 28 | 23 or 24 |
| 29 | 18 or 22 or 25 or 27 or 28 |
| 30 | 19 and 29 |

**Table S3.** Study characteristics at baseline of the Phase III RCTs included in the meta-analysis.

| **Study and year and reference** | **Trial number Identifier** | **Study characteristics** | **Study duration (weeks)** | **Number of analyzed patients** | **Assessed triple FDC therapy (doses and regimen of administration)** | **Assessed comparator (doses and regimen of administration)** | **Inhaler device (brand)** | **Patients’ characteristics** | **Age (years)** | **Male (%)** | **Duration of asthma (years)** | **Atopic status** | **Pre-bronchodilator FEV1 (% predicted)** | **Reversibility (%)** | **Rate of exacerbation in the previous year** | **Mean blood eosinophil count (cells per µL)** | **Current smokers (%)** | **ACQ at baseline (score)** | **Jadad score** | **Summary of results** |
| --- | --- | --- | --- | --- | --- | --- | --- | --- | --- | --- | --- | --- | --- | --- | --- | --- | --- | --- | --- | --- |
| **Lee et al., 2020, CAPTAIN** 25 | NCT02924688 | Phase IIIA, multicentre, randomized, double-blind, active-controlled, parallel-group | 52.0 | 2,436 | FF/VI/UMEC (100/25/31.25 µg q.d.), FF/VI/UMEC (100/25/62.5 µg q.d.), FF/VI/UMEC (200/25/31.25 µg q.d.), FF/VI/UMEC (200/25/62.5 µg q.d.) | FF/VI (100/25 µg q.d.), FF/VI (200/25 µg q.d.) | FF/VI/UMEC: DPI (Ellipta®); FF/VI: DPI (Ellipta®) | Inadequately controlled moderate or severe asthma (pre-bronchodilator FEV1≥30% and <85% predicted; airway reversibility at screening defined as an increase in FEV1≥12% and ≥200 mL after four inhalations of albuterol or salbutamol; ICS stable use >250 µg per day for ≥6 weeks prior to pre-screening) | 53.2 | 38.0 | 21.2 | NA | 58.5 | 29.9 | 0.8 | 228 | 0.0 | 2.8 | 5 | Adding UMEC to FF/VI improved lung function but did not lead to a significant reduction in moderate and/or severe exacerbations. |
| **Kerstjens et al., 2020 IRIDIUM** 26 | NCT02571777 | Phase III, multicentre, randomized, double-blind, double-dummy, active-controlled, parallel-group | 52.0 | 2,474 | MOM/IND/GLY (80/150/50 µg q.d.), MOM/IND/GLY (160/150/50 µg q.d.) | MOM/IND (160/150 µg q.d.), MOM/IND 320/150 µg q.d.) | MOM/IND/GLY: DPI (Breezhaler®); MOM/IND: DPI (Breezhaler®) | Inadequately controlled asthma (pre-bronchodilator FEV1<80% predicted; ≥1 asthma exacerbation requiring medical care from a physician, ER visit, hospitalization, and systemic corticosteroid treatment in the year prior to screening; airway reversibility defined as an increase in FEV1≥12% and ≥200 mL after inhalation of albuterol or salbutamol; use of ICS/LABA medium- or high-dose for ≥3 months and at stable dose for ≥1 month prior to screening) | 52.2 | 38.0 | 18.1 | NA | 54.8 | 27.7 | 1.3 | NA | NA | 2.5 | 5 | MOM/IND/GLY improved lung function vs. MOM/IND. |
| **Virchow et al., 2019 TRIMARAN** 27 | NCT02676076 | Phase III, multicentre, randomized, double-blind, active-controlled, parallel-group | 52.0 | 1,150 | BDP/FOR/GLY (200/12/20 µg b.i.d.) | BDP/FOR (200/12 µg b.i.d.) | BDP/FOR/GLY: pMDI (NA); BDP/FOR: pMDI (NA) | Uncontrolled asthma (pre-bronchodilator FEV1<80% predicted; ≥1 asthma exacerbation requiring an ER visit or hospitalization or systemic corticosteroid treatment in the year prior to study entry; airway reversibility defined as an increase in FEV1≥12% and ≥200 mL at 10–15 min after inhalation of salbutamol 400 µg; use of ICS/LABA medium-dose for ≥1 month prior to study entry) | 52.6 | 38.5 | 25.0 | NA | 55.5 | 31.7 | 1.2 | NA | 0.0 | 2.3 | 5 | Adding GLY to BDP/FOR improved lung function and reduced exacerbations. |
| **Virchow et al., 2019 TRIGGER** 27 | NCT02676089 | Phase III, multicentre, randomized, double-blind, active-controlled, parallel-group | 52.0 | 1,144 | BDP/FOR/GLY (400/12/20 µg b.i.d.) | BDP/FOR (400/12 µg b.i.d.) | BDP/FOR/GLY: pMDI (NA); BDP/FOR: pMDI (NA) | Uncontrolled asthma (pre-bronchodilator FEV1<80% predicted; ≥1 asthma exacerbation requiring an ER visit or hospitalization or systemic corticosteroid treatment in the year prior to study entry; airway reversibility defined as an increase in FEV1≥12% and ≥200 mL at 10–15 min after inhalation of salbutamol 400 µg; use of ICS/LABA high-dose for ≥1 month prior to study entry) | 52.9 | 38.7 | 25.2 | NA | 51.9 | 34.0 | 1.2 | NA | 0.0 | 2.4 | 5 | Adding GLY to BDP/FOR improved lung function and reduced exacerbations. |

ACQ: asthma control questionnaire; BDP: beclomethasone dipropionate; b.i.d., bis in die (twice-daily); DPI: dry powder inhaler; ER: emergency room; FDC: fixed-dose combination; FEV1: forced expiratory volume in the 1st second; FF: fluticasone furoate; FOR: formoterol fumarate; GLY: glycopyrronium bromide; ICS: inhaled corticosteroid; IND: indacaterol; LABA: long-acting β2 adrenoceptor agonist; q.d.: quaque die (once daily); MOM: mometasone furoate; NA: not available; pMDI: pressurized metered dose inhaler; RCT: randomized controlled trial; SAL: salmeterol; UMEC: umeclidinium bromide; VI: vilanterol.

**Supplementary figures**

**
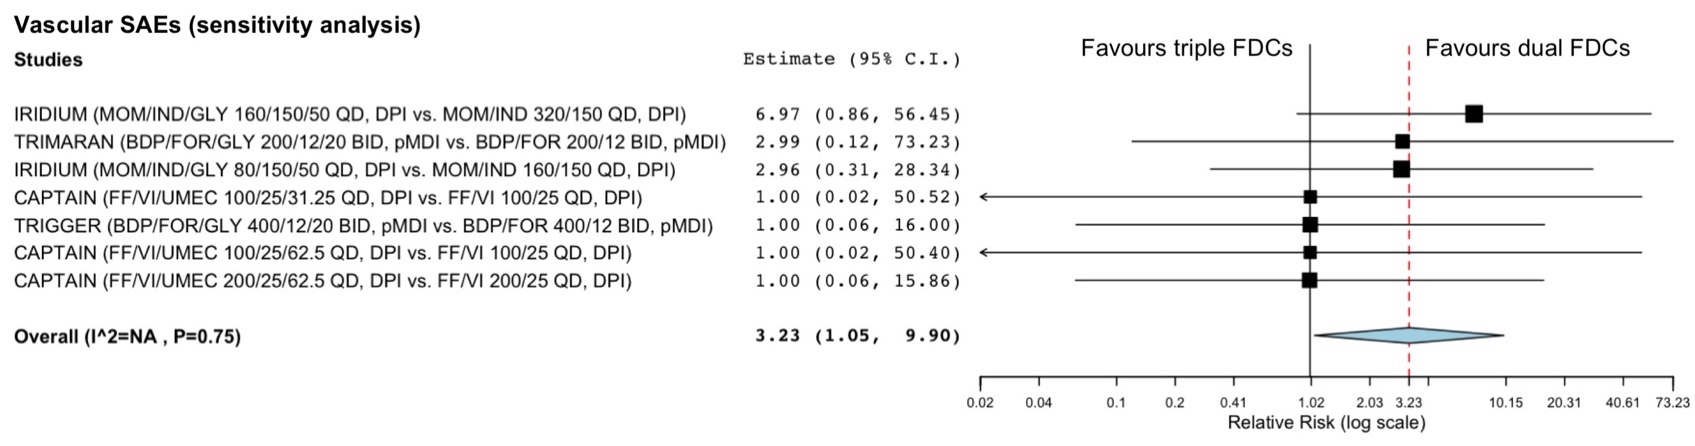
**

**Figure S1.** Forest plot of sensitivity meta-analysis concerning the impact of triple FDCs vs. ICS/LABA FDCs on the risk of vascular SAEs by excluding the comparison (FF/VI/UMEC 200/25/31.25 vs. FF/VI 200/25) that introduced substantial heterogeneity in the subgroup high-dose ICS. BDP: beclomethasone dipropionate; BID: bis in die (twice daily); DPI: dry powder inhaler; FDC: fixed-dose combination; FF, fluticasone furoate; FOR, formoterol fumarate; GLY, glycopyrronium; ICS: inhaled corticosteroid; IND, indacaterol; LABA: long-acting β2-adrenoceptor agonist; MOM, mometasone furoate; pMDI: pressurized metered dose inhaler; QD: quaque die (once daily); SAEs: serious adverse events; UMEC: umeclidinium bromide; VI: vilanterol.

**Appendix 1**

Summary text of the identified records.

1: Rogliani P, Ritondo BL, Zerillo B, Matera MG, Calzetta L. Drug interaction and chronic obstructive respiratory disorders. Curr Res Pharmacol Drug Discov.2020 Dec 13;2:100009. doi: 10.1016/j.crphar.2020.100009. Erratum in: Curr Res Pharmacol Drug Discov. 2021 Jun 24;2:100032. PMID: 34909645; PMCID: PMC8663976.

2: Ridha Z, Bédard MA, Smyrnova A, Drouin O, Pruteanu A, Essouri S, Ducharme FM. Tiotropium bromide as adjunct therapy in children with asthma: a clinical experience. Allergy Asthma Clin Immunol. 2021 Dec 12;17(1):129. doi: 10.1186/s13223-021-00632-4. PMID: 34895321; PMCID: PMC8666101.

3: Mtibaa M, Gupta S, Muthukumar M, Marvel J, Kaur H, Ishikawa R, Olivenstein R. Cost-Effectiveness of Once-Daily, Single-Inhaler Indacaterol Acetate/Glycopyrronium Bromide/ Mometasone Furoate in Patients with Uncontrolled Moderate-to-Severe Asthma in Canada. Clinicoecon Outcomes Res. 2021 Dec 3;13:957-967. doi: 10.2147/CEOR.S336915. PMID: 34887668; PMCID: PMC8650773.

4: Buendía JA, Patiño DG. Cost-utility of triple versus dual inhaler therapy in moderate to severe asthma. BMC Pulm Med. 2021 Dec 5;21(1):398. doi: 10.1186/s12890-021-01777-z. PMID: 34865635; PMCID: PMC8647470.

5: Pelaia C, Crimi C, Crimi N, Ricciardi L, Scichilone N, Valenti G, Bonavita O, Andaloro S, Morini P, Rizzi A, Pelaia G. Indacaterol/Glycopyrronium/Mometasone fixed dose combination for uncontrolled asthma. Expert Rev Respir Med. 2021 Nov 30. doi: 10.1080/17476348.2021.2011222. Epub ahead of print. PMID: 34845963.

6: Chen D, Du K, Niu X, Zhang H, Zhang X, Tang Y, Zhao J. Development and validation of LC-MS/MS method for amlexanox in rat plasma and its application in preclinical pharmacokinetics. Biomed Chromatogr. 2021 Nov 29:e5288. doi: 10.1002/bmc.5288. Epub ahead of print. PMID: 34842293.

7: de Llano LP, Naval E, Mejía N, Domínguez-Ortega J. Inhaled indacaterol/glycopyrronium/mometasone furoate fixed-dose combination in moderate-to-severe asthma. Expert Rev Respir Med. 2021 Nov 16. doi: 10.1080/17476348.2021.2005585. Epub ahead of print. PMID: 34783265.

8: Feo-Brito F, Alfaya Arias T, Amo-Salas M, Somoza Álvarez ML, Haroun Díaz E, Mayorga Mayorga C, Fernández Santamaría R, Urra Ardanaz JM. Clinical impact and immunological alterations in asthmatic patients allergic to grass pollen subjected to high urban pollution in Madrid. Clin Exp Allergy. 2021 Nov 6. doi: 10.1111/cea.14041. Epub ahead of print. PMID: 34741765.

9: Lee H, Ryu J, Chung SJ, Yeo Y, Park TS, Park DW, Moon JY, Kim TH, Sohn JW, Yoon HJ, Kim SH. Short-Acting Beta2-Agonist Use in Asthma in Korea: A 10-Year Population-Based Study. Allergy Asthma Immunol Res. 2021 Nov;13(6):945-953. doi: 10.4168/aair.2021.13.6.945. PMID: 34734512; PMCID: PMC8569021.

10: Bachar R, Majewski JR, Shrack C, El-Khoury A. Acute psychosis and serotonin syndrome in the setting of "Triple-C" overdose: a case report. J Med Case Rep. 2021 Nov 4;15(1):548. doi: 10.1186/s13256-021-03163-z. PMID: 34732250; PMCID: PMC8566019.

11: Louis R, Bougard N, Louis G, Pétré B, Schleich F. Le médicament du mois. Combinaison fixe mométasone, indacatérol, glycopyrronium pour le traitement de l’asthme sévère : Enerzair® Breezhaler® [Fixed combination of mometasone, indacaterol, glycopyrronium for the treatment of severe asthma : Enerzair® Breezhaler®]. Rev Med Liege. 2021 Oct;76(10):768-772. French. PMID: 34632748.

12: Rogliani P, Ritondo BL, Puxeddu E, Cazzola M, Calzetta L. Impact of long-acting muscarinic antagonists on small airways in asthma and COPD: A systematic review. Respir Med. 2021 Nov-Dec;189:106639. doi: 10.1016/j.rmed.2021.106639. Epub 2021 Oct 5. PMID: 34628125.

13: Oppenheimer J, Bogart M, Bengtson LGS, White J, Sundquist K, Lima R, Averell C. Treatment Patterns and Disease Burden Associated with Multiple-Inhaler Triple-Therapy Use in Asthma. J Allergy Clin Immunol Pract. 2021 Oct 6:S2213-2198(21)01060-6. doi: 10.1016/j.jaip.2021.09.033. Epub ahead of print. PMID: 34626859.

14: Usmani O, Roche N, Wahab E, Israel S, Jenkins M, Trivedi R, Dorinsky P, Aurivillius M. A scintigraphy study of budesonide/glycopyrrolate/formoterol fumarate metered dose inhaler in patients with moderate-to-very severe chronic obstructive pulmonary disease. Respir Res. 2021 Oct 7;22(1):261. doi: 10.1186/s12931-021-01813-w. PMID: 34620167; PMCID: PMC8496011.

15: Cella M, Täubel J, Delestre-Levai I, Tulard A, Vele A, Georges G. Ethnic Sensitivity Study of the Extrafine, Single-Inhaler, Triple Therapy Beclomethasone Dipropionate, Formoterol Fumarate, and Glycopyrronium Bromide Pressurized Metered Dose Inhaler in Japanese and Caucasian Healthy Individuals: A Randomized, Double-Blind, Single-Dose Crossover Study. Clin Ther. 2021 Sep 29:S0149-2918(21)00353-2. doi: 10.1016/j.clinthera.2021.09.001. Epub ahead of print. PMID: 34600734.

16: Ünsay Metan E, Bavbek S. Sabit doz inhale kortikosteroid, uzun etkili beta-2 agonist ve uzun etkili muskarinik reseptör antagonisti (İKS/LABA/LAMA) kombinasyonunun astım tedavisindeki yer [The role of fixed dose combinations of inhaled cortikosteroids, long acting beta-2 agonists, and long acting muscarinic antagonists (ICS/LABA/LAMA) in the treatment of asthma]. Tuberk Toraks. 2021 Sep;69(3):369-379. Turkish. doi: 10.5578/tt.20219709. PMID: 34581158.

17: Baan EJ, Hoeve CE, De Ridder M, Demoen L, Lahousse L, Brusselle GG, Verhamme KMC. The ALPACA study: (In)Appropriate LAMA prescribing in asthma: A cohort analysis. Pulm Pharmacol Ther. 2021 Dec;71:102074. doi: 10.1016/j.pupt.2021.102074. Epub 2021 Sep 20. PMID: 34555527.

18: Buendia JA, Guerrero Patiño D, Cossio-Giraldo YE. Cost‑effectiveness of tiotropium versus omalizumab for uncontrolled allergic asthma. J Asthma. 2021 Oct 12:1-8. doi: 10.1080/02770903.2021.1984527. Epub ahead of print. PMID: 34551659.

19: Suissa S, Dell'Aniello S, Ernst P. Triple Inhaler versus Dual Bronchodilator Therapy in COPD: Real-World Effectiveness on Mortality. COPD. 2021 Sep 21:1-9. doi: 10.1080/15412555.2021.1977789. Epub ahead of print. PMID: 34544314.

20: Gibson PG, McDonald VM, Granchelli A, Olin JT. Asthma and Comorbid Conditions-Pulmonary Comorbidity. J Allergy Clin Immunol Pract. 2021 Nov;9(11):3868-3875. doi: 10.1016/j.jaip.2021.08.028. Epub 2021 Sep 4. PMID: 34492401.

21: Geng M, Tang Y, Liu K, Huang K, Yan S, Ding P, Zhang J, Wang B, Wang S, Li S, Wu X, Cao Y, Tao F. Prenatal low-dose antibiotic exposure and children allergic diseases at 4 years of age: A prospective birth cohort study. Ecotoxicol Environ Saf. 2021 Dec 1;225:112736. doi: 10.1016/j.ecoenv.2021.112736. Epub 2021 Sep 1. PMID: 34481356.

22: Agusti A, Fabbri L, Lahousse L, Singh D, Papi A. Single inhaler triple therapy (SITT) in asthma: Systematic review and practice implications. Allergy. 2021 Sep 3. doi: 10.1111/all.15076. Epub ahead of print. PMID: 34478578.

23: Rosenberg K. Dual vs. Triple Therapy for Patients with Moderate to Severe Asthma. Am J Nurs. 2021 Sep 1;121(9):56. doi: 10.1097/01.NAJ.0000790636.32742.fc. PMID: 34438430.

24: Stiefelhagen P. Triple schlägt Double : Exazerbationen senken beim Asthma bronchiale. MMW Fortschr Med. 2021 Aug;163(14):66. German. doi: 10.1007/s15006-021-0192-1. PMID: 34370263.

25: Rogliani P, Ritondo BL, Facciolo F, Matera MG, Nikolaev I, Calzetta L. Indacaterol, glycopyrronium, and mometasone: Pharmacological interaction and anti-inflammatory profile in hyperresponsive airways. Pharmacol Res. 2021 Oct;172:105801. doi: 10.1016/j.phrs.2021.105801. Epub 2021 Aug 5. PMID: 34363950.

26: Kerwin E, Dorinsky P, Patel M, Rossman K, Reisner C, Maes A, Darken P, Griffis D, Fjällbrant H. A randomized controlled trial of glycopyrrolate administered by metered dose inhaler in patients with uncontrolled asthma despite ICS/LABA treatment. J Asthma. 2021 Aug 1:1-13. doi: 10.1080/02770903.2021.1938603. Epub ahead of print. PMID: 34338132.

27: Mangia PP, Gallo O, Ritrovato D, Pradelli L. Cost-Utility Analysis of Fixed-Dose Combination of Indacaterol Acetate Glycopyrronium Bromide and Mometasone Furoate as a Maintenance Treatment in Adult Patients with Asthma Not Adequately Controlled with a Maintenance Combination of a Long-Acting Beta-Agonist and a High Dose of an Inhaled Corticosteroid Who Experienced One or More Asthma Exacerbations in the Previous Year. Clin Drug Investig. 2021 Sep;41(9):785-794. doi: 10.1007/s40261-021-01067-w. Epub 2021 Jul 31. PMID: 34333742; PMCID:PMC8390398.

28: Buhl R, Nikolaev I, Tillmann HC, Vaidya S, Bartels C, Jain M, Jauernig J, Kerstjens HAM. Dose bridging data for mometasone furoate in once-daily fixed-dose inhaled combinations of mometasone furoate/indacaterol and mometasone furoate/ indacaterol/glycopyrronium in patients with asthma. Pulm Pharmacol Ther. 2021 Oct;70:102068. doi: 10.1016/j.pupt.2021.102068. Epub 2021 Jul 28. PMID: 34329722.

29: Rabe KF, Celli BR, Wechsler ME, Abdulai RM, Luo X, Boomsma MM, Staudinger H, Horowitz JE, Baras A, Ferreira MA, Ruddy MK, Nivens MC, Amin N, Weinreich DM, Yancopoulos GD, Goulaouic H. Safety and efficacy of itepekimab in patients with moderate-to-severe COPD: a genetic association study and randomised, double-blind, phase 2a trial. Lancet Respir Med. 2021 Nov;9(11):1288-1298. doi: 10.1016/S2213-2600(21)00167-3. Epub 2021 Jul 21. PMID: 34302758.

30: Ojanguren I, Pilia MF. Efficacy and safety of once-daily single-inhaler triple therapy in patients with inadequately controlled asthma: the CAPTAIN trial. Breathe (Sheff). 2021 Mar;17(1):200279. doi: 10.1183/20734735.0279-2020. PMID: 34295395; PMCID: PMC8291932.

31: Hozawa S, Ohbayashi H, Tsuchiya M, Hara Y, Lee LA, Nakayama T, Tamaoki J, Fowler A, Nishi T. Safety of Once-Daily Single-Inhaler Triple Therapy with Fluticasone Furoate/Umeclidinium/Vilanterol in Japanese Patients with Asthma: A Long-Term (52-Week) Phase III Open-Label Study. J Asthma Allergy. 2021 Jul 6;14:809-819. doi: 10.2147/JAA.S305918. PMID: 34262299; PMCID: PMC8275015.

32: Ora J, Calzetta L, Ritondo BL, Matera MG, Rogliani P. Current long-acting muscarinic antagonists for the treatment of asthma. Expert Opin Pharmacother. 2021 Dec;22(17):2343-2357. doi: 10.1080/14656566.2021.1952182. Epub 2021 Jul 15. PMID: 34219573.

33: van den Berge M, De Backer J, Van Holsbeke C, De Backer W, Trivedi R, Jenkins M, Dorinsky P, Aurivillius M. Functional respiratory imaging assessment of budesonide/glycopyrrolate/formoterol fumarate and glycopyrrolate/formoterol fumarate metered dose inhalers in patients with COPD: the value of inhaled corticosteroids. Respir Res. 2021 Jul 1;22(1):191. doi: 10.1186/s12931-021-01772-2. PMID: 34210340; PMCID: PMC8247252.

34: Huang L, Xu DQ, Chen YY, Fu RJ, Yue SJ, Yin JF, Tang YP. Qualitative and quantitative analysis of chemical components in Eupatorium lindleyanum DC. by ultra-performance liquid chromatography-mass spectrometry integrated with anti- inflammatory activity research. J Sep Sci. 2021 Sep;44(17):3174-3187. doi: 10.1002/jssc.202100208. Epub 2021 Jul 8. PMID: 34184412.

35: Muro S, Sugiura H, Darken P, Dorinsky P. Efficacy of budesonide/glycopyrronium/formoterol metered dose inhaler in patients with COPD: post-hoc analysis from the KRONOS study excluding patients with airway reversibility and high eosinophil counts. Respir Res. 2021 Jun 28;22(1):187. doi: 10.1186/s12931-021-01773-1. Erratum in: Respir Res. 2021 Aug 9;22(1):223. PMID: 34182998; PMCID: PMC8240276.

36: Paplinska-Goryca M, Misiukiewicz-Stepien P, Proboszcz M, Nejman-Gryz P, Gorska K, Zajusz-Zubek E, Krenke R. Interactions of nasal epithelium with macrophages and dendritic cells variously alter urban PM-induced inflammation in healthy, asthma and COPD. Sci Rep. 2021 Jun 24;11(1):13259. doi: 10.1038/s41598-021-92626-w. PMID: 34168212; PMCID: PMC8225888.

37: Plaza V, Alobid I, Alvarez C, Blanco M, Ferreira J, García G, Gómez-Outes A, Gómez F, Hidalgo A, Korta J, Molina J, Pellegrini FJ, Pérez M, Plaza J, Praena M, Quirce S, Sanz J. Spanish Asthma Management Guidelines (GEMA) VERSION 5.1. Highlights and Controversies. Arch Bronconeumol (Engl Ed). 2021 May 26:S0300-2896(21)00165-4. English, Spanish. doi: 10.1016/j.arbres.2021.05.010. Epub ahead of print. PMID: 34167859.

38: Pavord ID, Chapman KR, Bafadhel M, Sciurba FC, Bradford ES, Schweiker Harris S, Mayer B, Rubin DB, Yancey SW, Paggiaro P. Mepolizumab for Eosinophil- Associated COPD: Analysis of METREX and METREO. Int J Chron Obstruct Pulmon Dis. 2021 Jun 16;16:1755-1770. doi: 10.2147/COPD.S294333. PMID: 34163157; PMCID: PMC8215850.

39: Nakamura Y, Hozawa S, Sagara H, Ohbayashi H, Lee LA, Crawford J, Tamaoki J, Nishi T, Fowler A. Efficacy and safety of once-daily, single-inhaler fluticasone furoate/umeclidinium/vilanterol versus fluticasone furoate/vilanterol in Japanese patients with inadequately controlled asthma: the CAPTAIN study. Curr Med Res Opin. 2021 Sep;37(9):1657-1665. doi: 10.1080/03007995.2021.1944849. Epub 2021 Jul 14. PMID: 34162298.

40: Muro S, Suzuki M, Nakamura S, Wang JR, Garry EM, Sakamoto W, de Souza S. Real-world effectiveness of early intervention with fixed-dose tiotropium/olodaterol vs tiotropium in Japanese patients with COPD: a high- dimensional propensity score-matched cohort analysis. Respir Res. 2021 Jun 17;22(1):180. doi: 10.1186/s12931-021-01776-y. PMID: 34140019; PMCID: PMC8212527.

41: Huang WC, Chen CY, Liao WC, Wu BR, Chen WC, Tu CY, Chen CH, Cheng WC. A Real World Study to Assess the Effectiveness of Switching to Once Daily Closed Triple Therapy from Mono/Dual Combination or Open Triple Therapy in Patients with Chronic Obstructive Pulmonary Disease. Int J Chron Obstruct Pulmon Dis. 2021 Jun 3;16:1555-1568. doi: 10.2147/COPD.S308911. PMID: 34113089; PMCID: PMC8184143.

42: Kim H, Pfeiffer CM, Gray MP, Stottlemyer BA, Boyce RD, Kane-Gill SL. Assessing Adverse Drug Reactions Reported for New Respiratory Medications in the FDA Adverse Event Reporting System Database. Respir Care. 2021 Nov;66(11):1739-1745. doi: 10.4187/respcare.08809. Epub 2021 Jun 8. PMID: 34103383.

43: Price D, Jones R, Pfister P, Cao H, Carter V, Kemppinen A, Holzhauer B, Kaplan A, Clark A, Halpin DMG, Pinnock H, Chalmers JD, van Boven JFM, Beeh KM, Kostikas K, Roche N, Usmani O, Mastoridis P. Maximizing Adherence and Gaining New Information For Your Chronic Obstructive Pulmonary Disease (MAGNIFY COPD): Study Protocol for the Pragmatic, Cluster Randomized Trial Evaluating the Impact of Dual Bronchodilator with Add-On Sensor and Electronic Monitoring on Clinical Outcomes. Pragmat Obs Res. 2021 May 24;12:25-35. doi: 10.2147/POR.S302809. PMID: 34079422; PMCID: PMC8163732.

44: Montanaro A, Weinstein S, Beaudot C, Scott SM, Georges G. Efficacy and safety of inhaled extrafine beclomethasone dipropionate in adults with asthma: a randomized, parallel-group, dose-ranging study (BEAM). J Asthma. 2021 May 24:1-10. doi: 10.1080/02770903.2021.1928184. Epub ahead of print. PMID: 34030555.

45: Bartels C, Jain M, Yu J, Tillmann HC, Vaidya S. Population Pharmacokinetic Analysis of Indacaterol/Glycopyrronium/Mometasone Furoate After Administration of Combination Therapies Using the Breezhaler<sup>®</sup> Device in Patients with Asthma. Eur J Drug Metab Pharmacokinet. 2021 Jul;46(4):487-504. doi: 10.1007/s13318-021-00689-x. Epub 2021 May 22. PMID: 34024035; PMCID: PMC8298373.

46: Kim LHY, Saleh C, Whalen-Browne A, O'Byrne PM, Chu DK. Triple vs Dual Inhaler Therapy and Asthma Outcomes in Moderate to Severe Asthma: A Systematic Review and Meta-analysis. JAMA. 2021 Jun 22;325(24):2466-2479. doi: 10.1001/jama.2021.7872. PMID: 34009257; PMCID: PMC8135065.

47: Mosnaim G, Bizik BK, Wilson C, Bensch G. Efficacy and safety of add-on tiotropium in the management of uncontrolled asthma: a patient case series. J Asthma. 2021 May 11:1-6. doi: 10.1080/02770903.2021.1914648. Epub ahead of print. PMID: 33974467.

48: Kalhan R, Slade D, Ray R, Moretz C, Germain G, Laliberté F, Shen Q, Duh MS, MacKnight SD, Hahn B. Umeclidinium/Vilanterol Compared with Fluticasone Propionate/Salmeterol, Budesonide/Formoterol, and Tiotropium as Initial Maintenance Therapy in Patients with COPD Who Have High Costs and Comorbidities. Int J Chron Obstruct Pulmon Dis. 2021 Apr 22;16:1149-1161. doi: 10.2147/COPD.S298032. PMID: 33911860; PMCID: PMC8075186.

49: Beier J, Watz H, Diamant Z, Hohlfeld JM, Singh D, Pinot P, Jones I, Tillmann HC. Lung function improvements following inhaled indacaterol/glycopyrronium/mometasone furoate are independent of dosing time in asthma patients: a randomised trial. ERJ Open Res. 2021 Apr 19;7(2):00425-2020. doi: 10.1183/23120541.00425-2020. PMID: 33898609; PMCID: PMC8053816.

50: Blair HA. Indacaterol/Glycopyrronium/Mometasone: A Review in Asthma. Drugs. 2021 Apr;81(6):709-719. doi: 10.1007/s40265-021-01518-w. Epub 2021 Apr 19. PMID: 33871819.

51: Chapman KR, Watz H, Singh D, Hohlfeld JM, Diamant Z, Jones I, Tillmann HC, Nikolaev I. Lung Function Normalisation with Indacaterol Acetate/Glycopyrronium Bromide/Mometasone Furoate in Patients with Asthma. Clin Drug Investig. 2021 May;41(5):489-492. doi: 10.1007/s40261-021-01033-6. Epub 2021 Apr 17. PMID: 33864631; PMCID: PMC8149339.

52: Olschewski H, Buhl R, Funk GC, Valipour A, Vogelmeier CF. Chronisch- obstruktive Lungenerkrankung 2021 – die richtige Therapie für den richtigen Patienten [Chronic obstructive pulmonary disease: the right treatment for the right patient]. Internist (Berl). 2021 Jun;62(6):679-685. German. doi: 10.1007/s00108-021-01021-0. Epub 2021 Apr 16. PMID: 33860810; PMCID: PMC8217063.

53: Larsson K, Ekberg-Jansson A, Stridsman C, Hanno M, Vanfleteren LEGW. Adherence to Treatment Recommendations for Chronic Obstructive Pulmonary Disease - Results from the Swedish National Airway Register. Int J Chron Obstruct Pulmon Dis. 2021 Apr 6;16:909-918. doi: 10.2147/COPD.S300299. PMID: 33854309; PMCID: PMC8039432.

54: Charriot J, Maravic M, Huguet M, Vachier I, Suehs C, Bourdin A. "Real-life" management of patients with severe asthma in the biologics era: Can we do better? World Allergy Organ J. 2021 Mar 18;14(4):100528. doi: 10.1016/j.waojou.2021.100528. PMID: 33815653; PMCID: PMC7985558.

55: Monteagudo M, Barrecheguren M, Solntseva I, Dhalwani N, Booth A, Nuñez A, Lambrelli D, Miravitlles M. Clinical characteristics and factors associated with triple therapy use in newly diagnosed patients with COPD. NPJ Prim Care Respir Med. 2021 Mar 22;31(1):16. doi: 10.1038/s41533-021-00227-x. PMID: 33753747; PMCID: PMC7985144.

56: Sagara H, Barbier N, Ishii T, Yoshisue H, Nikolaev I, Hosoe M, Gon Y. Efficacy of one time per day, single-inhaler indacaterol/glycopyrronium/mometasone in patients with inadequately controlled asthma: post hoc analysis of IRIDIUM study in Asian population. BMJ Open Respir Res. 2021 Mar;8(1):e000856. doi: 10.1136/bmjresp-2020-000856. PMID: 33737310; PMCID: PMC7978265.

57: Requena G, Dedman D, Quint JK, Ghosh RE, Williams R, Pimenta JM. The Utilization and Safety of Umeclidinium and Umeclidinium/Vilanterol in UK Primary Care: A Retrospective Cohort Study. Int J Chron Obstruct Pulmon Dis. 2021 Mar 10;16:629-642. doi: 10.2147/COPD.S291931. PMID: 33731992; PMCID: PMC7956862.

58: Quint JK, Montonen J, Esposito DB, He X, Koerner L, Wallace L, de la Hoz A, Miravitlles M. Effectiveness and Safety of COPD Maintenance Therapy with Tiotropium/Olodaterol versus LABA/ICS in a US Claims Database. Adv Ther. 2021 May;38(5):2249-2270. doi: 10.1007/s12325-021-01646-5. Epub 2021 Mar 15. PMID: 33721209; PMCID: PMC8107175.

59: Scosyrev E, van Zyl-Smit R, Kerstjens H, Gessner C, Kornmann O, Jain D, Aubrun E, D'Andrea P, Hosoe M, Pethe A, Brittain D. Cardiovascular safety of mometasone/indacaterol and mometasone/indacaterol/glycopyrronium once-daily fixed-dose combinations in asthma: pooled analysis of phase 3 trials. Respir Med. 2021 Apr-May;180:106311. doi: 10.1016/j.rmed.2021.106311. Epub 2021 Jan 27. PMID: 33711782.

60: Roberts S, Williams CM, Roy S, Furuya Y. A Triple-challenge Mouse Model of Allergic Airway Disease, Primary Influenza Infection, and Secondary Bacterial Infection. Bio Protoc. 2020 Apr 20;10(8):e3583. doi: 10.21769/BioProtoc.3583. PMID: 33659553; PMCID: PMC7842559.

61: Alimam S, Villiers W, Dillon R, Simpson M, Runglall M, Smith A, Chatzikyriakou P, Lavender P, Kanda A, Mills K, Bellosillo Paricio B, Kaufman- Cook J, Ord S, Kordasti S, Radia D, Woodley C, Francis Y, Mufti G, McLornan DP, Harrison CN. Patients with triple-negative, JAK2V617F- and CALR-mutated essential thrombocythemia share a unique gene expression signature. Blood Adv. 2021 Feb 23;5(4):1059-1068. doi: 10.1182/bloodadvances.2020003172. Erratum in: Blood Adv. 2021 Jun 22;5(12):2575. PMID: 33599741; PMCID: PMC7903233.

62: Yang S, Lee LA, Sule N, Fowler A, Peachey G. Population Pharmacokinetic Modeling of Fluticasone Furoate, Umeclidinium Bromide, and Vilanterol in Patients with Asthma, Using Data from a Phase IIIA Study (CAPTAIN). Clin Pharmacokinet. 2021 Jul;60(7):887-896. doi: 10.1007/s40262-021-00988-1. Epub 2021 Feb 18. PMID: 33598874.

63: Papi A, Fabbri LM, Kerstjens HAM, Rogliani P, Watz H, Singh D. Inhaled long- acting muscarinic antagonists in asthma - A narrative review. Eur J Intern Med. 2021 Mar;85:14-22. doi: 10.1016/j.ejim.2021.01.027. Epub 2021 Feb 6. PMID: 33563506.

64: Cazzola M, Calzetta L, Matera MG. Long-acting muscarinic antagonists and small airways in asthma: Which link? Allergy. 2021 Jul;76(7):1990-2001. doi: 10.1111/all.14766. Epub 2021 Feb 27. PMID: 33559139.

65: Lipworth B, RuiWen Kuo C, Jabbal S, Chan R. Inhaled triple therapy and airway hyperresponsiveness in persistent asthma. Ann Allergy Asthma Immunol. 2021 May;126(5):597-598. doi: 10.1016/j.anai.2021.01.032. Epub 2021 Feb 3. PMID: 33548471.

66: Rogliani P, Ritondo BL, Calzetta L. Triple therapy in uncontrolled asthma: a network meta-analysis of phase III studies. Eur Respir J. 2021 Sep 2;58(3):2004233. doi: 10.1183/13993003.04233-2020. PMID: 33509960.

67: Beeh KM, Kuna P, Corradi M, Viaud I, Guasconi A, Georges G. Comparison of Dry-Powder Inhaler and Pressurized Metered-Dose Inhaler Formulations of Extrafine Beclomethasone Dipropionate/Formoterol Fumarate/Glycopyrronium in Patients with COPD: The TRI-D Randomized Controlled Trial. Int J Chron Obstruct Pulmon Dis. 2021 Jan 14;16:79-89. doi: 10.2147/COPD.S291030. PMID: 33488071; PMCID: PMC7814657.

68: Papi A, Virchow JC, Singh D, Kots M, Vele A, Georges G, Canonica GW. Extrafine triple therapy and asthma exacerbation seasonality: TRIMARAN and TRIGGER post hoc analyses. J Allergy Clin Immunol. 2021 Jul;148(1):262-265.e2. doi: 10.1016/j.jaci.2021.01.007. Epub 2021 Jan 21. PMID: 33485959.

69: Magnussen H, Lucas S, Lapperre T, Quint JK, Dandurand RJ, Roche N, Papi A, Price D, Miravitlles M; Respiratory Effectiveness Group (REG). Withdrawal of inhaled corticosteroids versus continuation of triple therapy in patients with COPD in real life: observational comparative effectiveness study. Respir Res. 2021 Jan 21;22(1):25. doi: 10.1186/s12931-021-01615-0. PMID: 33478491; PMCID: PMC7818945.

70: Zielen S, Reichert G, Donath H, Trischler J, Schulze J, Eickmeier O, Eckrich M, Blumchen K. Tiotropium as an Add-on Treatment Option for Severe Uncontrolled Asthma in Preschool Patients. J Asthma Allergy. 2021 Jan 14;14:23-30. doi: 10.2147/JAA.S274544. PMID: 33469318; PMCID: PMC7813466. 71: Wang ZY, Chu FH, Gu NN, Wang Y, Feng D, Zhao X, Meng XD, Zhang WT, Li CF, Chen Y, Wei SS, Ma ZQ, Lin RC, Zhao CJ, Zou DX. Integrated strategy of LC-MS and network pharmacology for predicting active constituents and pharmacological mechanisms of Ranunculus japonicus Thunb. for treating rheumatoid arthritis. J Ethnopharmacol. 2021 May 10;271:113818. doi: 10.1016/j.jep.2021.113818. Epub 2021 Jan 16. PMID: 33465444.

72: Expanded table: Correct use of inhalers for asthma. Med Lett Drugs Ther. 2020 Dec 14;62(1613):e204-e208. PMID: 33446624.

73: Expanded table: Some inhaled drugs for treatment of asthma. Med Lett Drugs Ther. 2020 Dec 14;62(1613):e200-e203. PMID: 33446623.

74: Drugs for asthma. Med Lett Drugs Ther. 2020 Dec 14;62(1613):193-200. PMID: 33446622.

75: Inoue S, Vaidya S, Tillmann HC, Sakita Y, Machineni S, Heudi O, Furihata K. Pharmacokinetics of indacaterol, glycopyrronium and mometasone furoate administered as an inhaled fixed-dose combination in Japanese and Caucasian healthy subjects. BMC Pulm Med. 2021 Jan 7;21(1):18. doi: 10.1186/s12890-020-01382-6. PMID: 33413291; PMCID: PMC7791651.

76: Tervonen T, Martinez FJ, Hanania NA, Heidenreich S, Eudicone JM, Gilbert I. Dual-combination maintenance inhaler preferences in asthma and chronic obstructive pulmonary disease: A patient-centered benefit-risk assessment. Respir Med. 2021 Jan;176:106278. doi: 10.1016/j.rmed.2020.106278. Epub 2020 Nov 29. PMID: 33387985.

77: Oppenheimer J, Slade DJ, Hahn BA, Zografos L, Gilsenan A, Richardson D, McSorley D, Lima R, Molfino NA, Averell CM. Real-world evidence: Patient views on asthma in respiratory specialist clinics in America. Ann Allergy Asthma Immunol. 2021 Apr;126(4):385-393.e2. doi: 10.1016/j.anai.2020.12.015. Epub 2020 Dec 31. PMID: 33387616.

78: Clinical Review Report: Indacaterol Acetate-Glycopyrronium Bromide- Mometasone Furoate (Enerzair Breezhaler): (Novartis Pharmaceuticals Canada Inc.): <b>Indication</b>: Asthma maintenance, adults [Internet]. Ottawa (ON): Canadian Agency for Drugs and Technologies in Health; 2021 Jan. PMID: 33877750.

79: Pharmacoeconomic Report: Indacaterol Acetate-Glycopyrronium Bromide- Mometasone Furoate (Enerzair Breezhaler): (Novartis Pharmaceuticals Canada Inc.): <b>Indication:</b> Asthma maintenance, adults [Internet]. Ottawa (ON): Canadian Agency for Drugs and Technologies in Health; 2021 Jan. PMID: 33764721.

80: Calzetta L, Ludovica Ritondo B, de Marco P, Cazzola M, Rogliani P. Reply to Han et al.: impact on mortality of triple ICS/LABA/LAMA therapy in a population of COPD patients including also subjects with asthma-like profile. Expert Rev Respir Med. 2021 Apr;15(4):579-581. doi: 10.1080/17476348.2021.1866835. Epub 2020 Dec 28. PMID: 33332207.

81: Southern KW, Murphy J, Sinha IP, Nevitt SJ. Corrector therapies (with or without potentiators) for people with cystic fibrosis with class II CFTR gene variants (most commonly F508del). Cochrane Database Syst Rev. 2020 Dec 17;12(12):CD010966. doi: 10.1002/14651858.CD010966.pub3. PMID: 33331662; PMCID: PMC8094390.

82: Quint JK, Venerus A, O'Leary C, Myland M, Holmgren U, Varghese P, Cabrera C. Prescribing Pathways to Triple Therapy: A Retrospective Observational Study of Adults with Chronic Obstructive Pulmonary Disease in the UK. Int J Chron Obstruct Pulmon Dis. 2020 Dec 8;15:3261-3271. doi: 10.2147/COPD.S278101. PMID: 33324049; PMCID: PMC7733404.

83: Wang Z, Wang ZZ, Geliebter J, Tiwari R, Li XM. Traditional Chinese medicine for food allergy and eczema. Ann Allergy Asthma Immunol. 2021 Jun;126(6):639-654. doi: 10.1016/j.anai.2020.12.002. Epub 2020 Dec 10. PMID: 33310179.

84: Han H, Chung SI, Park HJ, Oh EY, Kim SR, Park KH, Lee JH, Park JW. Obesity- induced Vitamin D Deficiency Contributes to Lung Fibrosis and Airway Hyperresponsiveness. Am J Respir Cell Mol Biol. 2021 Mar;64(3):357-367. doi: 10.1165/rcmb.2020-0086OC. PMID: 33296297.

85: Merlo C, Essig S, Brancati-Badarau DO, Leuppi JD, Speich B, Erlanger TE, Hemkens LG, Zeller A. Oral corticosteroids for post-infectious cough in adults: study protocol for a double-blind randomized placebo-controlled trial in Swiss family practices (OSPIC trial). Trials. 2020 Nov 23;21(1):949. doi: 10.1186/s13063-020-04848-4. PMID: 33225983; PMCID: PMC7681763.

86: Marzuki NM, Jaeb MZM, Ban A, Ismail AI, Ali IAH, Razali NM, Samsudin A, Nasaruddin MZ, Rahman RA, Zim MAM, Kassim R, Lam YF, Tarekh NA, Ibrahim A, Kapse SV. Personalised management of Chronic Obstructive Pulmonary Disease (COPD): Malaysian consensus algorithm for appropriate use of inhaled corticosteroid (ICS) in COPD patients. Med J Malaysia. 2020 Nov;75(6):717-721. PMID: 33219183.

87: Park SY, Kim S, Kim JH, Kim SH, Lee T, Yoon SY, Kim MH, Moon JY, Yang MS, Jung JW, Kim JH, Choi JH, Park CS, Kim S, Lee J, Kwon JW, Hur GY, Kim SH, Kim HK, Shin YS, Kim SH, Nam YH, Jang AS, Park SY, Kim TB; Cohort for Reality and Evolution of Adult Asthma in Korea (COREA) Study Group. A Randomized, Noninferiority Trial Comparing ICS + LABA with ICS + LABA + LAMA in Asthma-COPD Overlap (ACO) Treatment: The ACO Treatment with Optimal Medications (ATOMIC) Study. J Allergy Clin Immunol Pract. 2021 Mar;9(3):1304-1311.e2. doi: 10.1016/j.jaip.2020.09.066. Epub 2020 Nov 9. PMID: 33184024.

88: Jabbal S, Kuo CR, Lipworth B. Randomized controlled trial of triple versus dual inhaler therapy on small airways in smoking asthmatics. Clin Exp Allergy. 2020 Oct;50(10):1140-1147. doi: 10.1111/cea.13702. Epub 2020 Jul 27. PMID: 33180376.

89: Kaplan A, FitzGerald JM, Buhl R, Vogelberg C, Hamelmann E. Comparing LAMA with LABA and LTRA as add-on therapies in primary care asthma management. NPJ Prim Care Respir Med. 2020 Nov 11;30(1):50. doi: 10.1038/s41533-020-00205-9. PMID: 33177503; PMCID: PMC7658210.

90: Andújar-Espinosa R, Salinero-González L, Illán-Gómez F, Castilla-Martínez M, Hu-Yang C, Ruiz-López FJ. Effect of vitamin D supplementation on asthma control in patients with vitamin D deficiency: the ACVID randomised clinical trial. Thorax. 2021 Feb;76(2):126-133. doi: 10.1136/thoraxjnl-2019-213936. Epub 2020 Nov 5. PMID: 33154023.

91: Moretz C, Hahn B, White J, Goolsby Hunter A, Essoi B, Elliott C, Ray R. Symptom Burden and GOLD Classification in Medicare Advantage Patients with COPD Initiating Umeclidinium/Vilanterol or Fluticasone Propionate/Salmeterol Therapy. Int J Chron Obstruct Pulmon Dis. 2020 Oct 29;15:2715-2725. doi: 10.2147/COPD.S265037. PMID: 33149569; PMCID: PMC7605915.

92: CADTH Canadian Drug Expert Committee Recommendation: Indacaterol/Glycopyrronium/Mometasone Furoate (Enerzair Breezhaler — Novartis Pharmaceuticals Canada Inc.): Indication: Asthma maintenance, adults [Internet]. Ottawa (ON): Canadian Agency for Drugs and Technologies in Health; 2020 Nov. PMID: 33764723.

93: Buhl R, Dreher M, Korn S, Taube C, Stock C, Zehendner CM, Kondla A, Vogelmeier CF. A Non-Interventional Study of Tiotropium/Olodaterol versus Any Triple Combination Therapy for Chronic Obstructive Pulmonary Disease: The EVELUT<sup>®</sup> Study Protocol. Int J Chron Obstruct Pulmon Dis. 2020 Oct 22;15:2601-2608. doi: 10.2147/COPD.S262746. PMID: 33122898; PMCID: PMC7591229.

94: Singh D, Virchow JC, Canonica GW, Vele A, Kots M, Georges G, Papi A. Determinants of response to inhaled extrafine triple therapy in asthma: analyses of TRIMARAN and TRIGGER. Respir Res. 2020 Oct 29;21(1):285. doi: 10.1186/s12931-020-01558-y. PMID: 33121501; PMCID: PMC7597025.

95: Gessner C, Kornmann O, Maspero J, van Zyl-Smit R, Krüll M, Salina A, Gupta P, Bostel S, Fucile S, Conde LG, Pfister P. Corrigendum to "Fixed-dose combination of indacaterol/glycopyrronium/mometasone furoate once-daily versus salmeterol/fluticasone twice-daily plus tiotropium once-daily in patients with uncontrolled asthma: A randomised, Phase IIIb, non-inferiority study (ARGON)" [Respir. Med. 170 (Aug-Sep 2020) 106021]. Respir Med. 2020 Dec;175:106186. doi: 10.1016/j.rmed.2020.106186. Epub 2020 Oct 18. Erratum for: Respir Med. 2020 Aug - Sep;170:106021. PMID: 33082033.

96: Lei H, Zhang Y, Ye J, Cheng T, Liang Y, Zu X, Zhang W. A comprehensive quality evaluation of Fuzi and its processed product through integration of UPLC-QTOF/MS combined MS/MS-based mass spectral molecular networking with multivariate statistical analysis and HPLC-MS/MS. J Ethnopharmacol. 2021 Feb 10;266:113455. doi: 10.1016/j.jep.2020.113455. Epub 2020 Oct 8. PMID: 33039630.

97: Vaidya S, Jauernig J, Ethell B, Abdallah N, Machineni S, Drollmann A, Heudi O, Last S, Hahn M, Radhakrishnan R, Ignatenko S, Tillmann HC. Pharmacokinetics of indacaterol, glycopyrronium and mometasone furoate following once-daily inhalation as a combination in healthy subjects. Pulm Pharmacol Ther. 2020 Oct;64:101964. doi: 10.1016/j.pupt.2020.101964. Epub 2020 Oct 6. PMID: 33035700.

98: Monteagudo M, Nuñez A, Solntseva I, Dhalwani N, Booth A, Barrecheguren M, Lambrelli D, Miravitlles M. Treatment Pathways Before and After Triple Therapy in COPD: A Population-based Study in Primary Care in Spain. Arch Bronconeumol (Engl Ed). 2021 Mar;57(3):205-213. English, Spanish. doi: 10.1016/j.arbres.2020.07.032. Epub 2020 Sep 29. PMID: 33004238.

99: Brightling CE, Gaga M, Inoue H, Li J, Maspero J, Wenzel S, Maitra S, Lawrence D, Brockhaus F, Lehmann T, Brindicci C, Knorr B, Bleecker ER. Effectiveness of fevipiprant in reducing exacerbations in patients with severe asthma (LUSTER-1 and LUSTER-2): two phase 3 randomised controlled trials. Lancet Respir Med. 2021 Jan;9(1):43-56. doi: 10.1016/S2213-2600(20)30412-4. Epub 2020 Sep 24. PMID: 32979986.

100: Miller D, Vaidya S, Jauernig J, Ethell B, Wagner K, Radhakrishnan R, Tillmann HC. Lung function, pharmacokinetics, and tolerability of inhaled indacaterol maleate and acetate in asthma patients. Respir Res. 2020 Sep 23;21(1):248. doi: 10.1186/s12931-020-01501-1. PMID: 32967685; PMCID: PMC7513528.

101: Table: Correct Use of inhalers for COPD. Med Lett Drugs Ther. 2020 Sep 7;62(1606):e150-e154. PMID: 32960876.

102: Lee LA, Bailes Z, Barnes N, Boulet LP, Edwards D, Fowler A, Hanania NA, Kerstjens HAM, Kerwin E, Nathan R, Oppenheimer J, Papi A, Pascoe S, Brusselle G, Peachey G, Sule N, Tabberer M, Pavord ID. Efficacy and safety of once-daily single-inhaler triple therapy (FF/UMEC/VI) versus FF/VI in patients with inadequately controlled asthma (CAPTAIN): a double-blind, randomised, phase 3A trial. Lancet Respir Med. 2021 Jan;9(1):69-84. doi: 10.1016/S2213-2600(20)30389-1. Epub 2020 Sep 9. Erratum in: Lancet Respir Med. 2021 Jan 4;: PMID: 32918892.

103: Sarlus H, Codita A, Wang X, Cedazo-Minguez A, Schultzberg M, Oprica M. Chronic Airway Allergy Induces Pro-Inflammatory Responses in the Brain of Wildtype Mice but Not 3xTgAD Mice. Neuroscience. 2020 Nov 10;448:14-27. doi: 10.1016/j.neuroscience.2020.09.005. Epub 2020 Sep 8. PMID: 32916195.

104: Di Mauro A, Baldassarre ME, Brindisi G, Zicari AM, Tarantini M, Laera N, Capozza M, Panza R, Salvatore S, Pensabene L, Fanelli M, Laforgia N. Hydrolyzed Protein Formula for Allergy Prevention in Preterm Infants: Follow-Up Analysis of a Randomized, Triple-Blind, Placebo-Controlled Study. Front Pediatr. 2020 Jul 30;8:422. doi: 10.3389/fped.2020.00422. PMID: 32903747; PMCID: PMC7438860. 105: Gessner C, Kornmann O, Maspero J, van Zyl-Smit R, Krüll M, Salina A, Gupta P, Bostel S, Fucile S, Conde LG, Pfister P. Fixed-dose combination of indacaterol/glycopyrronium/mometasone furoate once-daily versus salmeterol/fluticasone twice-daily plus tiotropium once-daily in patients with uncontrolled asthma: A randomised, Phase IIIb, non-inferiority study (ARGON). Respir Med. 2020 Aug-Sep;170:106021. doi: 10.1016/j.rmed.2020.106021. Epub 2020 May 27. Erratum in: Respir Med. 2020 Dec;175:106186. PMID: 32843164.

106: Paplinska-Goryca M, Misiukiewicz-Stepien P, Proboszcz M, Nejman-Gryz P, Gorska K, Krenke R. The Expressions of TSLP, IL-33, and IL-17A in Monocyte Derived Dendritic Cells from Asthma and COPD Patients are Related to Epithelial- Macrophage Interactions. Cells. 2020 Aug 22;9(9):1944. doi: 10.3390/cells9091944. PMID: 32842623; PMCID: PMC7565129.

107: Omori T, Nakamori S, Fujimoto N, Ishida M, Kitagawa K, Ichikawa Y, Kumagai N, Kurita T, Imanaka-Yoshida K, Hiroe M, Sakuma H, Ito M, Dohi K. Myocardial Native T<sub>1</sub> Predicts Load-Independent Left Ventricular Chamber Stiffness In Patients With HFpEF. JACC Cardiovasc Imaging. 2020 Oct;13(10):2117-2128. doi: 10.1016/j.jcmg.2020.05.030. Epub 2020 Aug 5. PMID: 32771571.

108: Hong H, Liao S, Chen F, Yang Q, Wang DY. Role of IL-25, IL-33, and TSLP in triggering united airway diseases toward type 2 inflammation. Allergy. 2020 Nov;75(11):2794-2804. doi: 10.1111/all.14526. Epub 2020 Aug 14. PMID: 32737888.

109: Zhang Q, Chen S, Liu A, Wang Y. Quantification of 10 bioactive components of Yazhangsan in rat plasma by LC-MS/MS and its application. Biomed Chromatogr. 2020 Dec;34(12):e4958. doi: 10.1002/bmc.4958. Epub 2020 Sep 10. PMID: 32725639.

110: Ait Bamai Y, Goudarzi H, Araki A, Okada E, Kashino I, Miyashita C, Kishi R. Effect of prenatal exposure to per- and polyfluoroalkyl substances on childhood allergies and common infectious diseases in children up to age 7 years: The Hokkaido study on environment and children's health. Environ Int. 2020 Oct;143:105979. doi: 10.1016/j.envint.2020.105979. Epub 2020 Jul 24. PMID: 32717646.

111: Luz MI, Aguiar R, Morais-Almeida M. The reality of LAMAs for adult asthmatic patients. Expert Rev Respir Med. 2020 Nov;14(11):1087-1094. doi: 10.1080/17476348.2020.1794828. Epub 2020 Jul 20. PMID: 32687426.

112: Virchow JC. Assessing the benefits of triple versus dual fixed-dose combinations for the treatment of severe asthma. Lancet Respir Med. 2020 Oct;8(10):937-939. doi: 10.1016/S2213-2600(20)30303-9. Epub 2020 Jul 9. PMID: 32653077.

113: van Zyl-Smit RN, Krüll M, Gessner C, Gon Y, Noga O, Richard A, de Los Reyes A, Shu X, Pethe A, Tanase AM, D'Andrea P; PALLADIUM trial investigators. Once- daily mometasone plus indacaterol versus mometasone or twice-daily fluticasone plus salmeterol in patients with inadequately controlled asthma (PALLADIUM): a randomised, double-blind, triple-dummy, controlled phase 3 study. Lancet Respir Med. 2020 Oct;8(10):987-999. doi: 10.1016/S2213-2600(20)30178-8. Epub 2020 Jul 9. PMID: 32653075.

114: Kerstjens HAM, Maspero J, Chapman KR, van Zyl-Smit RN, Hosoe M, Tanase AM, Lavecchia C, Pethe A, Shu X, D'Andrea P; IRIDIUM trial investigators. Once- daily, single-inhaler mometasone-indacaterol-glycopyrronium versus mometasone- indacaterol or twice-daily fluticasone-salmeterol in patients with inadequately controlled asthma (IRIDIUM): a randomised, double-blind, controlled phase 3 study. Lancet Respir Med. 2020 Oct;8(10):1000-1012. doi: 10.1016/S2213-2600(20)30190-9. Epub 2020 Jul 9. PMID: 32653074.

115: Ghasemi Sakha F, Azimi Saeen A, Moazzeni SM, Etesam F, Vaezi G. A Randomized, Triple-blind Placebo-controlled Trial to Determine the Effect of Saffron on the Serum Levels of MMP-9 and TIMP-1 in Patients with Multiple Sclerosis. Iran J Allergy Asthma Immunol. 2020 Jun 23;19(3):297-304. doi: 10.18502/ijaai.v19i3.3457. PMID: 32615663.

116: Avdeev SN, Aisanov ZR, Belevsky AS, Beeh KM, Vizel AA, Zyryanov SK, Ignatova GL, Kostikas K, Leshchenko IV, Ovcharenko SI, Sinopal'nikov AI, Titova ON, Shmelev EI. [The concept of chronic obstructive pulmonary disease clinical control as a decision - making tool in real clinical practice for optimizing of basic pharmacotherapy]. Ter Arkh. 2020 Jan 15;92(1):89-95. Russian. doi: 10.26442/00403660.2020.01.000489. PMID: 32598669.

117: Velázquez-Quesada I, Ruiz-Moreno AJ, Casique-Aguirre D, Aguirre-Alvarado C, Cortés-Mendoza F, de la Fuente-Granada M, García-Pérez C, Pérez-Tapia SM, González-Arenas A, Segura-Cabrera A, Velasco-Velázquez MA. Pranlukast Antagonizes CD49f and Reduces Stemness in Triple-Negative Breast Cancer Cells. Drug Des Devel Ther. 2020 May 12;14:1799-1811. doi: 10.2147/DDDT.S247730. PMID: 32494122; PMCID: PMC7229803.

118: Singh D, Virchow JC, Canonica GW, Vele A, Kots M, Georges G, Papi A. Extrafine triple therapy in patients with asthma and persistent airflow limitation. Eur Respir J. 2020 Sep 24;56(3):2000476. doi: 10.1183/13993003.00476-2020. PMID: 32430414.

119: Chipps B, Mosnaim G, Mathur SK, Shaikh A, Khoury S, Gopalan G, Palli SR, Lamerato L, Casciano J, Dotiwala Z, Settipane R. Add-on tiotropium versus step- up inhaled corticosteroid plus long-acting beta-2-agonist in real-world patients with asthma. Allergy Asthma Proc. 2020 Jul 1;41(4):248-255. doi: 10.2500/aap.2020.41.200036. Epub 2020 May 15. PMID: 32414426.

120: Lipson DA, Dransfield MT, Han MK. Reply to Suissa: Mortality in IMPACT: Confounded by Asthma? Am J Respir Crit Care Med. 2020 Sep 1;202(5):773-774. doi: 10.1164/rccm.202004-1399LE. PMID: 32396736; PMCID: PMC7462388.

121: Suissa S. Mortality in IMPACT: Confounded by Asthma? Am J Respir Crit Care Med. 2020 Sep 1;202(5):772-773. doi: 10.1164/rccm.202004-1159LE. PMID: 32396735; PMCID: PMC7462402.

122: Suzuki T, Fairburn-Beech J, Sato K, Kaise T. Clinical characteristics, treatment patterns, disease burden, and persistence/adherence in patients with asthma initiating inhaled triple therapy: real-world evidence from Japan. Curr Med Res Opin. 2020 Jun;36(6):1049-1057. doi: 10.1080/03007995.2020.1763937. Epub 2020 May 14. PMID: 32363945.

123: Matera MG, Belardo C, Rinaldi M, Rinaldi B, Cazzola M. New perspectives on the role of muscarinic antagonists in asthma therapy. Expert Rev Respir Med. 2020 Aug;14(8):817-824. doi: 10.1080/17476348.2020.1758069. Epub 2020 Apr 26. PMID: 32316778.

124: Matera MG, Belardo C, Rinaldi M, Rinaldi B, Cazzola M. Emerging muscarinic receptor antagonists for the treatment of asthma. Expert Opin Emerg Drugs. 2020 Jun;25(2):123-130. doi: 10.1080/14728214.2020.1758059. Epub 2020 Jun 17. PMID: 32312134.

125: Bloom CI, Douglas I, Usmani OS, Quint JK. Inhaled Corticosteroid Treatment Regimens and Health Outcomes in a UK COPD Population Study. Int J Chron Obstruct Pulmon Dis. 2020 Apr 2;15:701-710. doi: 10.2147/COPD.S241568. Erratum in: Int J Chron Obstruct Pulmon Dis. 2020 Apr 22;15:869. PMID: 32308379; PMCID: PMC7136662.

126: Paplinska-Goryca M, Misiukiewicz-Stepien P, Nejman-Gryz P, Proboszcz M, Mlacki M, Gorska K, Krenke R. Epithelial-macrophage-dendritic cell interactions impact alarmins expression in asthma and COPD. Clin Immunol. 2020 Jun;215:108421. doi: 10.1016/j.clim.2020.108421. Epub 2020 Apr 14. PMID: 32302698.

127: Watz H, Hohlfeld JM, Singh D, Beier J, Diamant Z, Liu J, Hua S, Abd-Elaziz K, Pinot P, Jones I, Tillmann HC. Letter to the editor: indacaterol/glycopyrronium/mometasone furoate compared with salmeterol/fluticasone propionate in patients with asthma: a randomized controlled cross-over study. Respir Res. 2020 Apr 15;21(1):87. doi: 10.1186/s12931-020-01349-5. PMID: 32295593; PMCID: PMC7160900.

128: Nici L, Mammen MJ, Charbek E, Alexander PE, Au DH, Boyd CM, Criner GJ, Donaldson GC, Dreher M, Fan VS, Gershon AS, Han MK, Krishnan JA, Martinez FJ, Meek PM, Morgan M, Polkey MI, Puhan MA, Sadatsafavi M, Sin DD, Washko GR, Wedzicha JA, Aaron SD. Pharmacologic Management of Chronic Obstructive Pulmonary Disease. An Official American Thoracic Society Clinical Practice Guideline. Am J Respir Crit Care Med. 2020 May 1;201(9):e56-e69. doi: 10.1164/rccm.202003-0625ST. Erratum in: Am J Respir Crit Care Med. 2020 Sep 15;202(6):910. PMID: 32283960; PMCID: PMC7193862.

129: Li Y, Lim J, Stemkowski S, Kaila S, Renda A, Shaikh A. Initiation of triple therapy maintenance treatment among patients with COPD. Am J Manag Care. 2020 Apr 1;26(4):e106-e112. doi: 10.37765/ajmc.2020.42837. PMID: 32270987.

130: Kaplan AG. Inhaled Corticosteroid Treatment in Chronic Obstructive Pulmonary Disease (COPD): Boon or Bane? J Am Board Fam Med. 2020 Mar- Apr;33(2):289-302. doi: 10.3122/jabfm.2020.02.190227. PMID: 32179613.

131: Chung S, Lee YG, Karpurapu M, Englert JA, Ballinger MN, Davis IC, Park GY, Christman JW. Depletion of microRNA-451 in response to allergen exposure accentuates asthmatic inflammation by regulating Sirtuin2. Am J Physiol Lung Cell Mol Physiol. 2020 May 1;318(5):L921-L930. doi: 10.1152/ajplung.00457.2019. Epub 2020 Mar 11. PMID: 32159972; PMCID: PMC7272736.

132: Knibb RC, Alviani C, Garriga-Baraut T, Mortz CG, Vazquez-Ortiz M, Angier E, Blumchen K, Comberiati P, Duca B, DunnGalvin A, Gore C, Hox V, Jensen B, Pite H, Santos AF, Sanchez-Garcia S, Gowland MH, Timmermans F, Roberts G. The effectiveness of interventions to improve self-management for adolescents and young adults with allergic conditions: A systematic review. Allergy. 2020 Aug;75(8):1881-1898. doi: 10.1111/all.14269. PMID: 32159856.

133: Kardos P, Geiss F, Simon J, Franken C, Butt U, Worth H. Duplicate Prescriptions of Inhaled Medications for Obstructive Lung Diseases. Pneumologie. 2020 Mar;74(3):149-158. English. doi: 10.1055/a-1083-7961. Epub 2020 Mar 6. PMID: 32143230.

134: Ishiura Y, Fujimura M, Ohkura N, Hara J, Kasahara K, Ishii N, Sawai Y, Shimizu T, Tamaki T, Nomura S. Triple Therapy with Budesonide/Glycopyrrolate/Formoterol Fumarate Improves Inspiratory Capacity in Patients with Asthma-Chronic Obstructive Pulmonary Disease Overlap. Int J Chron Obstruct Pulmon Dis. 2020 Feb 5;15:269-277. doi: 10.2147/COPD.S231004. PMID: 32103926; PMCID: PMC7014958.

135: Calabria S, Ronconi G, Dondi L, Piccinni C, Pedrini A, Esposito I, Pistelli R, Martini N. Open triple therapy for chronic obstructive pulmonary disease: Patterns of prescription, exacerbations and healthcare costs from a large Italian claims database. Pulm Pharmacol Ther. 2020 Apr;61:101904. doi: 10.1016/j.pupt.2020.101904. Epub 2020 Feb 21. PMID: 32092473.

136: Bousquet J, Farrell J, Illario M; ARIA-MASK study group. Aligning the Good Practice MASK With the Objectives of the European Innovation Partnership on Active and Healthy Ageing. Allergy Asthma Immunol Res. 2020 Mar;12(2):238-258. doi: 10.4168/aair.2020.12.2.238. PMID: 32009320; PMCID: PMC6997284.

137: Ioachimescu OC, Janocko NJ, Ciavatta MM, Howard M, Warnock MV. Obstructive Lung Disease and Obstructive Sleep Apnea (OLDOSA) cohort study: 10-year assessment. J Clin Sleep Med. 2020 Feb 15;16(2):267-277. doi: 10.5664/jcsm.8180. Epub 2020 Jan 13. PMID: 31992433; PMCID: PMC7053033.

138: Mapel DW, Roberts MH, Davis J. Budesonide/formoterol therapy: effective and appropriate use in asthma and chronic obstructive pulmonary disease. J Comp Eff Res. 2020 Mar;9(4):231-251. doi: 10.2217/cer-2019-0161. Epub 2020 Jan 27. PMID: 31983228.

139: Matera MG, Rinaldi B, Berardo C, Rinaldi M, Cazzola M. A review of the pharmacokinetics of M<sub>3</sub> muscarinic receptor antagonists used for the treatment of asthma. Expert Opin Drug Metab Toxicol. 2020 Feb;16(2):143-148. doi: 10.1080/17425255.2020.1716730. Epub 2020 Jan 30. PMID: 31958237.

140: Vogelberg C, Goldstein S, Graham L, Kaplan A, de la Hoz A, Hamelmann E. A comparison of tiotropium, long-acting β<sub>2</sub>-agonists and leukotriene receptor antagonists on lung function and exacerbations in paediatric patients with asthma. Respir Res. 2020 Jan 13;21(1):19. doi: 10.1186/s12931-020-1282-9. PMID: 31931792; PMCID: PMC6958672.

141: Jensen ME, Ducharme FM, Alos N, Mailhot G, Mâsse B, White JH, Sadatsafavi M, Khamessan A, Tse SM, Alizadehfar R, Bock DE, Daigneault P, Lemire C, Yang C, Radhakrishnan D. Vitamin D in the prevention of exacerbations of asthma in preschoolers (DIVA): protocol for a multicentre randomised placebo-controlled triple-blind trial. BMJ Open. 2019 Dec 30;9(12):e033075. doi: 10.1136/bmjopen-2019-033075. PMID: 31892662; PMCID: PMC6955525.

142: Messinger AI, Luo G, Deterding RR. The doctor will see you now: How machine learning and artificial intelligence can extend our understanding and treatment of asthma. J Allergy Clin Immunol. 2020 Feb;145(2):476-478. doi: 10.1016/j.jaci.2019.12.898. Epub 2019 Dec 25. PMID: 31883444; PMCID: PMC7035143.

143: LeMessurier KS, Iverson AR, Chang TC, Palipane M, Vogel P, Rosch JW, Samarasinghe AE. Allergic inflammation alters the lung microbiome and hinders synergistic co-infection with H1N1 influenza virus and Streptococcus pneumoniae in C57BL/6 mice. Sci Rep. 2019 Dec 18;9(1):19360. doi: 10.1038/s41598-019-55712-8. PMID: 31852944; PMCID: PMC6920369.

144: Matera MG, Page CP, Calzetta L, Rogliani P, Cazzola M. Pharmacology and Therapeutics of Bronchodilators Revisited. Pharmacol Rev. 2020 Jan;72(1):218-252. doi: 10.1124/pr.119.018150. PMID: 31848208.

145: Sulku J, Janson C, Melhus H, Malinovschi A, Ställberg B, Bröms K, Högman M, Lisspers K, Hammarlund-Udenaes M, Nielsen EI. A Cross-Sectional Study Assessing Appropriateness Of Inhaled Corticosteroid Treatment In Primary And Secondary Care Patients With COPD In Sweden. Int J Chron Obstruct Pulmon Dis. 2019 Nov 5;14:2451-2460. doi: 10.2147/COPD.S218747. PMID: 31806954; PMCID: PMC6842319.

146: Lombardi C, Menzella F, Passalacqua G. Long-term responsiveness to mepolizumab after failure of omalizumab and bronchial thermoplasty: Two triple- switch case reports. Respir Med Case Rep. 2019 Nov 19;29:100967. doi: 10.1016/j.rmcr.2019.100967. PMID: 31799113; PMCID: PMC6881682.

147: Désirée LL, Margarita FV, Mónica RG, María Del Carmen CS, Jorge Agustín LP, José Antonio OM, Blanca DR, Erika Del Carmen LE, Jade RL, Juan Carlos VG, Jorge SP. An online survey detected knowledge gaps and cost-saving opportunities in asthma maintenance treatment among allergists, pulmonologists, ENTs and primary care. World Allergy Organ J. 2019 Nov 19;12(12):100084. doi: 10.1016/j.waojou.2019.100084. PMID: 31768217; PMCID: PMC6872758.

148: Gregoriano C, Tschacher A, Grendelmeier P, Cadus C. Inhalative Therapie bei COPD und Asthma [Development of inhaled therapies for COPD and asthma]. Ther Umsch. 2019 Nov;76(6):301-310. German. doi: 10.1024/0040-5930/a001103. PMID: 31762413.

149: Niimi A, Fukumitsu K, Takeda N, Kanemitsu Y. Interfering with airway nerves in cough associated with asthma. Pulm Pharmacol Ther. 2019 Dec;59:101854. doi: 10.1016/j.pupt.2019.101854. Epub 2019 Nov 1. PMID: 31683030.

150: Rogliani P, Matera MG, Facciolo F, Page C, Cazzola M, Calzetta L. Beclomethasone dipropionate, formoterol fumarate and glycopyrronium bromide: Synergy of triple combination therapy on human airway smooth muscle ex vivo. Br J Pharmacol. 2020 Mar;177(5):1150-1163. doi: 10.1111/bph.14909. Epub 2020 Jan 29. PMID: 31660611; PMCID: PMC7042115.

151: Cheng WC, Liao WC, Wu BR, Chen CY, Shen MF, Chen WC, Hsia TC, Tu CY, Chen CH, Hsu WH. Clinical predictors of asthmatics in identifying subgroup requiring long-term tiotropium add-on therapy: a real-world study. J Thorac Dis. 2019 Sep;11(9):3785-3793. doi: 10.21037/jtd.2019.09.22. PMID: 31656651; PMCID: PMC6790467.

152: Calzetta L, Matera MG, Cazzola M, Rogliani P. Optimizing the Development Strategy of Combination Therapy in Respiratory Medicine: From Isolated Airways to Patients. Adv Ther. 2019 Dec;36(12):3291-3298. doi: 10.1007/s12325-019-01119-w. Epub 2019 Oct 25. PMID: 31654332; PMCID: PMC6860506.

153: Averell CM, Laliberté F, Duh MS, Wu JW, Germain G, Faison S. Characterizing Real-World Use Of Tiotropium In Asthma In The USA. J Asthma Allergy. 2019 Oct 7;12:309-321. doi: 10.2147/JAA.S216932. PMID: 31632091; PMCID: PMC6789414.

154: Domingo C, Rello J, Sogo A. As-needed ICS-LABA in Mild Asthma: What Does the Evidence Say? Drugs. 2019 Nov;79(16):1729-1737. doi: 10.1007/s40265-019-01202-0. Erratum in: Drugs. 2019 Oct 29;: PMID: 31584145.

155: FitzGerald JM, Sadatsafavi M. Triple therapy in a single inhaler: a new option for uncontrolled asthma. Lancet. 2019 Nov 9;394(10210):1690-1692. doi: 10.1016/S0140-6736(19)32216-0. Epub 2019 Sep 30. PMID: 31582315.

156: Virchow JC, Kuna P, Paggiaro P, Papi A, Singh D, Corre S, Zuccaro F, Vele A, Kots M, Georges G, Petruzzelli S, Canonica GW. Single inhaler extrafine triple therapy in uncontrolled asthma (TRIMARAN and TRIGGER): two double-blind, parallel-group, randomised, controlled phase 3 trials. Lancet. 2019 Nov 9;394(10210):1737-1749. doi: 10.1016/S0140-6736(19)32215-9. Epub 2019 Sep 30. PMID: 31582314.

157: Fens T, van der Pol S, Kocks JWH, Postma MJ, van Boven JFM. Economic Impact of Reducing Inappropriate Inhaled Corticosteroids Use in Patients With Chronic Obstructive Pulmonary Disease: ISPOR's Guidance on Budget Impact in Practice. Value Health. 2019 Oct;22(10):1092-1101. doi: 10.1016/j.jval.2019.05.006. Epub 2019 Aug 17. PMID: 31563251.

158: Moretz C, Sharpsten L, Bengtson LG, Koep E, Le L, Tong J, Stanford RH, Hahn B, Ray R. Real-world effectiveness of umeclidinium/vilanterol versus fluticasone propionate/salmeterol as initial maintenance therapy for chronic obstructive pulmonary disease (COPD): a retrospective cohort study. Int J Chron Obstruct Pulmon Dis. 2019 Aug 1;14:1721-1737. doi: 10.2147/COPD.S204649. PMID: 31534326; PMCID: PMC6681903.

159: Voorham J, Corradi M, Papi A, Vogelmeier CF, Singh D, Fabbri LM, Kerkhof M, Kocks JH, Carter V, Price D. Comparative effectiveness of triple therapy <i>versus</i> dual bronchodilation in COPD. ERJ Open Res. 2019 Aug 30;5(3):00106-2019. doi: 10.1183/23120541.00106-2019. PMID: 31497610; PMCID: PMC6715826.

160: Moore BJR, Islam B, Ward S, Jackson O, Armitage R, Blackburn J, Haider S, McHugh PC. Repurposing of Tranilast for Potential Neuropathic Pain Treatment by Inhibition of Sepiapterin Reductase in the BH<sub>4</sub> Pathway. ACS Omega. 2019 Jul 10;4(7):11960-11972. doi: 10.1021/acsomega.9b01228. PMID: 31460307; PMCID: PMC6682008.

161: Cazzola M, Rogliani P, Matera MG. Ultra-LABAs for the treatment of asthma. Respir Med. 2019 Sep;156:47-52. doi: 10.1016/j.rmed.2019.08.005. Epub 2019 Aug 12. PMID: 31425937.

162: Cazzola M, Puxeddu E, Matera MG, Rogliani P. A potential role of triple therapy for asthma patients. Expert Rev Respir Med. 2019 Nov;13(11):1079-1085. doi: 10.1080/17476348.2019.1657408. Epub 2019 Sep 1. PMID: 31422716.

163: Pascoe S, Barnes N, Brusselle G, Compton C, Criner GJ, Dransfield MT, Halpin DMG, Han MK, Hartley B, Lange P, Lettis S, Lipson DA, Lomas DA, Martinez FJ, Papi A, Roche N, van der Valk RJP, Wise R, Singh D. Blood eosinophils and treatment response with triple and dual combination therapy in chronic obstructive pulmonary disease: analysis of the IMPACT trial. Lancet Respir Med. 2019 Sep;7(9):745-756. doi: 10.1016/S2213-2600(19)30190-0. Epub 2019 Jul 4. Erratum in: Lancet Respir Med. 2021 Dec;9(12):e114. PMID: 31281061.

164: Roberts S, Salmon SL, Steiner DJ, Williams CM, Metzger DW, Furuya Y. Allergic Airway Disease Prevents Lethal Synergy of Influenza A Virus- Streptococcus pneumoniae Coinfection. mBio. 2019 Jul 2;10(4):e01335-19. doi: 10.1128/mBio.01335-19. PMID: 31266877; PMCID: PMC6606812.

165: Wahid B. Successful treatment of HBV, HCV, & HEV, with 12-week long use of tenofovir, sofosbuvir, daclatasvir, and ribavirin: A case report. J Infect Public Health. 2020 Jan;13(1):149-150. doi: 10.1016/j.jiph.2019.06.004. Epub 2019 Jun 21. PMID: 31235341.

166: Ishiura Y, Fujimura M, Ohkura N, Hara J, Kasahara K, Ishii N, Tamaki T, Shimizu T, Nomura S. Effect of triple therapy in patients with asthma-COPD overlap . Int J Clin Pharmacol Ther. 2019 Aug;57(8):384-392. doi: 10.5414/CP203382. PMID: 31232275; PMCID: PMC6637394.

167: Huang WC, Gu PY, Fang LW, Huang YL, Lin CF, Liou CJ. Sophoraflavanone G from Sophora flavescens induces apoptosis in triple-negative breast cancer cells. Phytomedicine. 2019 Aug;61:152852. doi: 10.1016/j.phymed.2019.152852. Epub 2019 Jan 29. PMID: 31035052.

168: Almatrafi A, Alfadhli F, Khan YN, Afzal S, Hashmi JA, Ullah A, Albalawi AM, Basit S. A Heterozygous Mutation in the Triple Helical Region of the Alpha 1 (II) Chain of the COL2A1 Protein Causes Non-Lethal Spondyloepiphyseal Dysplasia Congenita. Genet Test Mol Biomarkers. 2019 May;23(5):310-315. doi: 10.1089/gtmb.2018.0301. Epub 2019 Mar 30. PMID: 30932712.

169: Gaduzo S, McGovern V, Roberts J, Scullion JE, Singh D. When to use single- inhaler triple therapy in COPD: a practical approach for primary care health care professionals. Int J Chron Obstruct Pulmon Dis. 2019 Feb 13;14:391-401. doi: 10.2147/COPD.S173901. PMID: 30863039; PMCID: PMC6388781.

170: Ducharme FM, Jensen M, Mailhot G, Alos N, White J, Rousseau E, Tse SM, Khamessan A, Vinet B. Impact of two oral doses of 100,000 IU of vitamin D<sub>3</sub> in preschoolers with viral-induced asthma: a pilot randomised controlled trial. Trials. 2019 Feb 18;20(1):138. doi: 10.1186/s13063-019-3184-z. PMID: 30777118; PMCID: PMC6379931.

171: Llanos JP, Bell CF, Packnett E, Thiel E, Irwin DE, Hahn B, Ortega H. Real- world characteristics and disease burden of patients with asthma prior to treatment initiation with mepolizumab or omalizumab: a retrospective cohort database study. J Asthma Allergy. 2019 Jan 25;12:43-58. doi: 10.2147/JAA.S189676. PMID: 30774390; PMCID: PMC6354698.

172: Kaplan A, Chapman KR, Anees SM, Mayers I, Rochdi D, Djandji M, Préfontaine D, McIvor A. Real-life effectiveness of indacaterol-glycopyrronium after switching from tiotropium or salmeterol/fluticasone therapy in patients with symptomatic COPD: the POWER study. Int J Chron Obstruct Pulmon Dis. 2019 Jan 18;14:249-260. doi: 10.2147/COPD.S185485. PMID: 30718952; PMCID: PMC6343749.

173: Parmar G, Pundarikakshudu K, Balaraman R. Anti-anaphylactic and antiasthmatic activity of <i>Euphorbia thymifolia</i> L. on experimental animals. J Tradit Complement Med. 2018 Apr 30;9(1):60-65. doi: 10.1016/j.jtcme.2018.03.002. PMID: 30671367; PMCID: PMC6335472.

174: Lee YG, Reader BF, Herman D, Streicher A, Englert JA, Ziegler M, Chung S, Karpurapu M, Park GY, Christman JW, Ballinger MN. Sirtuin 2 enhances allergic asthmatic inflammation. JCI Insight. 2019 Feb 21;4(4):e124710. doi: 10.1172/jci.insight.124710. PMID: 30668546; PMCID: PMC6478424.

175: Lépine M, Sleno L, Lesage J, Gagné S. A validated liquid chromatography/tandem mass spectrometry method for 4,4'-methylenedianiline quantitation in human urine as a measure of 4,4'-methylene diphenyl diisocyanate exposure. Rapid Commun Mass Spectrom. 2019 Mar 30;33(6):600-606. doi: 10.1002/rcm.8380. PMID: 30604511.

176: Yang CH, Su CH, Liu SC, Ng LT. Isolation, Anti-Inflammatory Activity and Physico-chemical Properties of Bioactive Polysaccharides from Fruiting Bodies of Cultivated Cordyceps cicadae (Ascomycetes). Int J Med Mushrooms. 2019;21(10):995-1006. doi: 10.1615/IntJMedMushrooms.2019031922. PMID: 32450036.

177: Vanfleteren L, Fabbri LM, Papi A, Petruzzelli S, Celli B. Triple therapy (ICS/LABA/LAMA) in COPD: time for a reappraisal. Int J Chron Obstruct Pulmon Dis. 2018 Dec 12;13:3971-3981. doi: 10.2147/COPD.S185975. PMID: 30587953; PMCID: PMC6296179.

178: Saito H, Tsuchiya K, Chiba S, Ogata T, Imase R, Yagi T, Mishima Y, Jinta T, Saito K, Taki R, Isogai S, Jin Y, Kawasaki T, Natsume I, Miyashita Y, Takagiwa J, Ishiwata N, Chiaki T, Kishi M, Tsukada Y, Yamasaki M, Inase N, Miyazaki Y. Treatment of asthma in smokers: A questionnaire survey in Japanese clinical practice. Respir Investig. 2019 Mar;57(2):126-132. doi: 10.1016/j.resinv.2018.11.001. Epub 2018 Dec 11. PMID: 30552072.

179: Watz H, Tetzlaff K, Magnussen H, Mueller A, Rodriguez-Roisin R, Wouters EFM, Vogelmeier C, Calverley PMA. Spirometric changes during exacerbations of COPD: a post hoc analysis of the WISDOM trial. Respir Res. 2018 Dec 13;19(1):251. doi: 10.1186/s12931-018-0944-3. PMID: 30545350; PMCID: PMC6293570.

180: Hosseini SA, Zilaee M, Shoushtari MH, Ghasemi Dehcheshmeh M. An evaluation of the effect of saffron supplementation on the antibody titer to heat-shock protein (HSP) 70, hsCRP and spirometry test in patients with mild and moderate persistent allergic asthma: A triple-blind, randomized placebo-controlled trial. Respir Med. 2018 Dec;145:28-34. doi: 10.1016/j.rmed.2018.10.016. Epub 2018 Oct 19. PMID: 30509713.

181: Hamelmann E. Managing Severe Asthma: A Role for the Long-Acting Muscarinic Antagonist Tiotropium. Biomed Res Int. 2018 Oct 24;2018:7473690. doi: 10.1155/2018/7473690. Erratum in: Biomed Res Int. 2019 Jan 29;2019:8515804. PMID: 30474042; PMCID: PMC6220412.

182: Kupczyk M, Kuna P. Beclomethasone dipropionate, formoterol fumarate and glycopyrronium bromide as a combination therapy for chronic obstructive pulmonary disease. Expert Rev Respir Med. 2019 Jan;13(1):5-11. doi: 10.1080/17476348.2019.1548937. Epub 2018 Nov 27. PMID: 30463457.

183: Muller A, Rochoy M. Plongée sous-marine et asthme : revue de littérature [Diving and asthma: Literature review]. Rev Pneumol Clin. 2018 Dec;74(6):416-426. French. doi: 10.1016/j.pneumo.2018.10.002. Epub 2018 Nov 12. PMID: 30442511.

184: Li Y, Li H, Sheng Y, Du X, Yao Y, Luo X, Ma P. Pharmacokinetics of Single and Repeat Doses of Fluticasone Furoate/Umeclidinium/Vilanterol in Healthy Chinese Adults. Clin Pharmacol Drug Dev. 2019 Aug;8(6):721-733. doi: 10.1002/cpdd.626. Epub 2018 Nov 14. PMID: 30427594.

185: Glied SA, Jackson A. How Would Americans' Out-of-Pocket Costs Change If Insurance Plans Were Allowed to Exclude Coverage for Preexisting Conditions? Issue Brief (Commonw Fund). 2018 Nov 1;2018:1-9. PMID: 30387577.

186: Erkman J, Vaynblat A, Thomas K, Segal LN, Levine J, Moy L, Greifer M, Giusti R, Shah R, Kazachkov M. Airway and esophageal eosinophils in children with severe uncontrolled asthma. Pediatr Pulmonol. 2018 Dec;53(12):1598-1603. doi: 10.1002/ppul.24180. Epub 2018 Oct 23. PMID: 30353711.

187: Suissa S, Dell'Aniello S, Ernst P. Comparative effectiveness of LABA-ICS versus LAMA as initial treatment in COPD targeted by blood eosinophils: a population-based cohort study. Lancet Respir Med. 2018 Nov;6(11):855-862. doi: 10.1016/S2213-2600(18)30368-0. Epub 2018 Oct 18. PMID: 30343028.

188: Buhl R, FitzGerald JM, Busse WW. Tiotropium add-on to inhaled corticosteroids versus addition of long-acting β<sub>2</sub>-agonists for adults with asthma. Respir Med. 2018 Oct;143:82-90. doi: 10.1016/j.rmed.2018.08.014. Epub 2018 Aug 29. PMID: 30261998.

189: Shi W, Lin Z, Liao C, Zhang J, Liu W, Wang X, Cai J, Zou Z, Wang H, Norback D, Kan H, Huang C, Zhao Z. Urinary phthalate metabolites in relation to childhood asthmatic and allergic symptoms in Shanghai. Environ Int. 2018 Dec;121(Pt 1):276-286. doi: 10.1016/j.envint.2018.08.043. Epub 2018 Sep 15. PMID: 30223204.

190: Tashkin DP, Strange C. Inhaled corticosteroids for chronic obstructive pulmonary disease: what is their role in therapy? Int J Chron Obstruct Pulmon Dis. 2018 Aug 27;13:2587-2601. doi: 10.2147/COPD.S172240. PMID: 30214177; PMCID: PMC6118265.

191: Hoshino M, Akitsu K, Ohtawa J. Comparison between montelukast and tiotropium as add-on therapy to inhaled corticosteroids plus a long-acting β<sub>2</sub>-agonist in for patients with asthma. J Asthma. 2019 Sep;56(9):995-1003. doi: 10.1080/02770903.2018.1514047. Epub 2018 Sep 13. PMID: 30212239.

192: Buhl R, Criée CP, Kardos P, Vogelmeier CF, Kostikas K, Lossi NS, Worth H. Dual bronchodilation vs triple therapy in the "real-life" COPD DACCORD study. Int J Chron Obstruct Pulmon Dis. 2018 Aug 24;13:2557-2568. doi: 10.2147/COPD.S169958. PMID: 30197512; PMCID: PMC6113909.

193: Hara J, Kasahara K, Ohkura N, Yamamura K, Sakai T, Abo M, Ogawa N, Saeki K, Koba H, Watanabe S, Uchida Y, Tambo Y, Sone T, Kimura H. A Single Institution Retrospective Study of the Clinical Efficacy of Tiotropium Respimat in Never- Smoking Elderly Asthmatics with Irreversible Airflow Limitation. Drug Res (Stuttg). 2019 Apr;69(4):211-217. doi: 10.1055/a-0665-4379. Epub 2018 Sep 7. PMID: 30193393.

194: Lopez-Campos JL, Navarrete BA, Soriano JB, Soler-Cataluña JJ, González-Moro JMR, Ferrer MEF, Rubio MC. Determinants of medical prescriptions for COPD care: an analysis of the EPOCONSUL clinical audit. Int J Chron Obstruct Pulmon Dis. 2018 Jul 27;13:2279-2288. doi: 10.2147/COPD.S160842. PMID: 30100718; PMCID: PMC6067777.

195: Yao XJ, Liu XF, Wang XD. Potential Role of Interleukin-25/Interleukin-33/Thymic Stromal Lymphopoietin-Fibrocyte Axis in the Pathogenesis of Allergic Airway Diseases. Chin Med J (Engl). 2018 Aug 20;131(16):1983-1989. doi: 10.4103/0366-6999.238150. PMID: 30082531; PMCID: PMC6085861.

196: Cheng WC, Wu BR, Liao WC, Chen CY, Chen WC, Hsia TC, Tu CY, Chen CH, Hsu WH. Clinical predictors of the effectiveness of tiotropium in adults with symptomatic asthma: a real-life study. J Thorac Dis. 2018 Jun;10(6):3661-3669. doi: 10.21037/jtd.2018.05.139. PMID: 30069364; PMCID: PMC6051811.

197: Sposato B, Scalese M, Milanese M, Masieri S, Cavaliere C, Ricci A, Paggiaro P. Should omalizumab be used in severe asthma/COPD overlap? J Biol Regul Homeost Agents. 2018 Jul-Aug;32(4):755-761. PMID: 30043557.

198: Vincken W, Levy ML, Scullion J, Usmani OS, Dekhuijzen PNR, Corrigan CJ. Spacer devices for inhaled therapy: why use them, and how? ERJ Open Res. 2018 Jun 18;4(2):00065-2018. doi: 10.1183/23120541.00065-2018. PMID: 29928649; PMCID: PMC6004521.

199: Bonaventure A, Orsi L, Rudant J, Goujon-Bellec S, Leverger G, Baruchel A, Bertrand Y, Nelken B, Pasquet M, Michel G, Sirvent N, Chastagner P, Ducassou S, Thomas C, Besse C, Hémon D, Clavel J. Genetic polymorphisms of Th2 interleukins, history of asthma or eczema and childhood acute lymphoid leukaemia: Findings from the ESCALE study (SFCE). Cancer Epidemiol. 2018 Aug;55:96-103. doi: 10.1016/j.canep.2018.05.004. Epub 2018 Jun 6. PMID: 29883839.

200: Hot topics from the Assemblies. Breathe (Sheff). 2018 Jun;14(2):157-158. doi: 10.1183/20734735.142118. PMID: 29875836; PMCID: PMC5980479.

201: Rodriguez-Martinez CE, Sossa-Briceño MP, Castro-Rodriguez JA. Cost Effectiveness of Pharmacological Treatments for Asthma: A Systematic Review. Pharmacoeconomics. 2018 Oct;36(10):1165-1200. doi: 10.1007/s40273-018-0668-8. PMID: 29869050.

202: Spergel JM, Aceves SS, Kliewer K, Gonsalves N, Chehade M, Wechsler JB, Groetch M, Friedlander J, Dellon ES, Book W, Hirano I, Muir AB, Cianferoni A, Spencer L, Liacouras CA, Cheng E, Kottyan L, Wen T, Platts-Mills T, Rothenberg ME. New developments in patients with eosinophilic gastrointestinal diseases presented at the CEGIR/TIGERS Symposium at the 2018 American Academy of Allergy, Asthma & Immunology Meeting. J Allergy Clin Immunol. 2018 Jul;142(1):48-53. doi: 10.1016/j.jaci.2018.05.005. Epub 2018 May 24. PMID: 29803797; PMCID: PMC6129859.

203: Reiger G, Zwick R, Lamprecht B, Kähler C, Burghuber OC, Valipour A. Phenotypes of COPD in an Austrian population : National data from the POPE study. Wien Klin Wochenschr. 2018 Jun;130(11-12):382-389. doi: 10.1007/s00508-018-1347-7. Epub 2018 May 24. PMID: 29797071.

204: Chapman KR, Hurst JR, Frent SM, Larbig M, Fogel R, Guerin T, Banerji D, Patalano F, Goyal P, Pfister P, Kostikas K, Wedzicha JA. Long-Term Triple Therapy De-escalation to Indacaterol/Glycopyrronium in Patients with Chronic Obstructive Pulmonary Disease (SUNSET): A Randomized, Double-Blind, Triple-Dummy Clinical Trial. Am J Respir Crit Care Med. 2018 Aug 1;198(3):329-339. doi: 10.1164/rccm.201803-0405OC. PMID: 29779416.

205: Grozdanovic M, Laffey KG, Abdelkarim H, Hitchinson B, Harijith A, Moon HG, Park GY, Rousslang LK, Masterson JC, Furuta GT, Tarasova NI, Gaponenko V, Ackerman SJ. Novel peptide nanoparticle-biased antagonist of CCR3 blocks eosinophil recruitment and airway hyperresponsiveness. J Allergy Clin Immunol. 2019 Feb;143(2):669-680.e12. doi: 10.1016/j.jaci.2018.05.003. Epub 2018 May 17. PMID: 29778505; PMCID: PMC6240402.

206: Dedaj R, Unsel L. Case study: A Combination of Mepolizumab and Omaluzimab injections for severe asthma. J Asthma. 2019 May;56(5):473-474. doi: 10.1080/02770903.2018.1471706. Epub 2018 Oct 25. PMID: 29733738.

207: Suknuntha K, Yubolphan R, Krueaprasertkul K, Srihirun S, Sibmooh N, Vivithanaporn P. Leukotriene Receptor Antagonists Inhibit Mitogenic Activity in Triple Negative Breast Cancer Cells. Asian Pac J Cancer Prev. 2018 Mar 27;19(3):833-837. doi: 10.22034/APJCP.2018.19.3.833. PMID: 29582642; PMCID: PMC5980863.

208: Sobieraj DM, Baker WL, Nguyen E, Weeda ER, Coleman CI, White CM, Lazarus SC, Blake KV, Lang JE. Association of Inhaled Corticosteroids and Long-Acting Muscarinic Antagonists With Asthma Control in Patients With Uncontrolled, Persistent Asthma: A Systematic Review and Meta-analysis. JAMA. 2018 Apr 10;319(14):1473-1484. doi: 10.1001/jama.2018.2757. Erratum in: JAMA. 2018 May 8;319(18):1939. PMID: 29554174; PMCID: PMC5876909.

209: Hurst JR, Dilleen M, Morris K, Hills S, Emir B, Jones R. Factors influencing treatment escalation from long-acting muscarinic antagonist monotherapy to triple therapy in patients with COPD: a retrospective THIN- database analysis. Int J Chron Obstruct Pulmon Dis. 2018 Mar 5;13:781-792. doi: 10.2147/COPD.S153655. PMID: 29551894; PMCID: PMC5842770.

210: Mesonzhnik NV, Moskaleva NE, Shestakova KM, Kurynina KO, Baranov PA, Gretskaya NM, Serkov IV, Lyubimov II, Bezuglov VV, Appolonova SA. LC-MS/MS Identification and Structural Characterization of Main Biodegradation Products of Nitroproston - A Novel Prostaglandin-based Pharmaceutical Compound. Drug Metab Lett. 2018;12(1):54-61. doi: 10.2174/1872312812666180309160927. PMID: 29521215.

211: Sobieraj DM, Baker WL, Weeda ER, Nguyen E, Coleman CI, White CM, Lazarus SC, Blake KV, Lang JE. Intermittent Inhaled Corticosteroids and Long-Acting Muscarinic Antagonists for Asthma [Internet]. Rockville (MD): Agency for Healthcare Research and Quality (US); 2018 Mar. Report No.: 17(18)-EHC027-EF. PMID: 29741837.

212: Zhang L, Huang G, Jin L, Han S. Therapeutic Effects of a Long-Acting Cholinergic Receptor Blocker, Tiotropium Bromide, on Asthma. Med Sci Monit. 2018 Feb 15;24:944-950. doi: 10.12659/msm.907950. PMID: 29446377; PMCID: PMC5822933.

213: Papi A, Vestbo J, Fabbri L, Corradi M, Prunier H, Cohuet G, Guasconi A, Montagna I, Vezzoli S, Petruzzelli S, Scuri M, Roche N, Singh D. Extrafine inhaled triple therapy versus dual bronchodilator therapy in chronic obstructive pulmonary disease (TRIBUTE): a double-blind, parallel group, randomised controlled trial. Lancet. 2018 Mar 17;391(10125):1076-1084. doi: 10.1016/S0140-6736(18)30206-X. Epub 2018 Feb 9. Erratum in: Lancet. 2018 Feb 26;: PMID: 29429593.

214: Zafari Z, Sadatsafavi M, Mark FitzGerald J; Canadian Respiratory Research Network. Cost-effectiveness of tiotropium versus omalizumab for uncontrolled allergic asthma in US. Cost Eff Resour Alloc. 2018 Jan 30;16:3. doi: 10.1186/s12962-018-0089-8. PMID: 29422778; PMCID: PMC5789632. 215: Song YD, Li XZ, Wu YX, Shen Y, Liu FF, Gao PP, Sun L, Qian F. Emodin alleviates alternatively activated macrophage and asthmatic airway inflammation in a murine asthma model. Acta Pharmacol Sin. 2018 Aug;39(8):1317-1325. doi: 10.1038/aps.2017.147. Epub 2018 Feb 8. PMID: 29417945; PMCID: PMC6289379.

216: Fukumitsu K, Kanemitsu Y, Asano T, Takeda N, Ichikawa H, Yap JMG, Fukuda S, Uemura T, Takakuwa O, Ohkubo H, Maeno K, Ito Y, Oguri T, Nakamura A, Takemura M, Niimi A. Tiotropium Attenuates Refractory Cough and Capsaicin Cough Reflex Sensitivity in Patients with Asthma. J Allergy Clin Immunol Pract. 2018 Sep- Oct;6(5):1613-1620.e2. doi: 10.1016/j.jaip.2018.01.016. Epub 2018 Feb 3. PMID: 29408386.

217: Johansson G, Mushnikov V, Bäckström T, Engström A, Khalid JM, Wall J, Hoti F. Exacerbations and healthcare resource utilization among COPD patients in a Swedish registry-based nation-wide study. BMC Pulm Med. 2018 Jan 25;18(1):17. doi: 10.1186/s12890-018-0573-0. PMID: 29370846; PMCID: PMC5784707.

218: Padrão E, Araújo D, Todo Bom A, Robalo Cordeiro C, Correia de Sousa J, Cardoso J, Morais-Almeida M, Costa R, Pavão F, Leite RB, Marques A. Asthma-COPD overlap: A Portuguese survey. Pulmonology. 2018 Jan 12:S2173-5115(17)30181-1. doi: 10.1016/j.rppnen.2017.11.009. Epub ahead of print. PMID: 29338973.

219: Meltzer EO, Berger WE. A review of the efficacy and safety of once-daily tiotropium Respimat 2.5 micrograms in adults and adolescents with asthma. Allergy Asthma Proc. 2018 Jan 6;39(1):14-26. doi: 10.2500/aap.2018.39.4103. PMID: 29279056.

220: Dreher M, Müller T. Add-on Therapy for Symptomatic Asthma despite Long- Acting Beta-Agonists/Inhaled Corticosteroid. Tuberc Respir Dis (Seoul). 2018 Jan;81(1):1-5. doi: 10.4046/trd.2017.0102. Epub 2017 Dec 13. PMID: 29256220; PMCID: PMC5771741.

221: Corral Gudino L, Borao Cengotita-Bengoa M, Jorge Sánchez RJ, García Aparicio J. El paciente y su travesía entre la atención primaria y la hospitalaria. Revisión sistemática de ensayos clínicos para la implementación de herramientas para la integración en España [The patient and the crossing between Primary and Hospital care. Systematic review of trials for the implementation of tools for integration in Spain]. An Sist Sanit Navar. 2017 Dec 29;40(3):443-459. Spanish. doi: 10.23938/ASSN.0119. PMID: 29215657.

222: Casale TB, Bateman ED, Vandewalker M, Virchow JC, Schmidt H, Engel M, Moroni-Zentgraf P, Kerstjens HAM. Tiotropium Respimat Add-on Is Efficacious in Symptomatic Asthma, Independent of T2 Phenotype. J Allergy Clin Immunol Pract. 2018 May-Jun;6(3):923-935.e9. doi: 10.1016/j.jaip.2017.08.037. Epub 2017 Nov 22. PMID: 29174062.

223: Singh D, Corradi M, Spinola M, Papi A, Usmani OS, Scuri M, Petruzzelli S, Vestbo J. Triple therapy in COPD: new evidence with the extrafine fixed combination of beclomethasone dipropionate, formoterol fumarate, and glycopyrronium bromide. Int J Chron Obstruct Pulmon Dis. 2017 Oct 6;12:2917-2928. doi: 10.2147/COPD.S146822. PMID: 29062229; PMCID: PMC5638574.

224: Lee L, Kerwin E, Collison K, Nelsen L, Wu W, Yang S, Pascoe S. The effect of umeclidinium on lung function and symptoms in patients with fixed airflow obstruction and reversibility to salbutamol: A randomised, 3-phase study. Respir Med. 2017 Oct;131:148-157. doi: 10.1016/j.rmed.2017.08.013. Epub 2017 Aug 14. PMID: 28947022.

225: Nandyal S, Suria S, Chogtu B, Bhattacharjee D. Risk of GERD with Diabetes Mellitus, Hypertension and Bronchial Asthma - A Hospital based Retrospective Cohort Study. J Clin Diagn Res. 2017 Jul;11(7):OC25-OC29. doi: 10.7860/JCDR/2017/25571.10232. Epub 2017 Jul 1. PMID: 28892957; PMCID: PMC5583783.

226: Kalach N, Bontems P, Raymond J. Helicobacter pylori infection in children. Helicobacter. 2017 Sep;22 Suppl 1. doi: 10.1111/hel.12414. PMID: 28891139.

227: Beasley R, Hardy J, Hancox R. Asthma prescribing: Where are we headed? Respirology. 2017 Nov;22(8):1487-1488. doi: 10.1111/resp.13159. Epub 2017 Aug 27. PMID: 28845601.

228: Makadia LD, Roper PJ, Andrews JO, Tingen MS. Tobacco Use and Smoke Exposure in Children: New Trends, Harm, and Strategies to Improve Health Outcomes. Curr Allergy Asthma Rep. 2017 Aug;17(8):55. doi: 10.1007/s11882-017-0723-0. PMID: 28741144.

229: Sánchez J, Zakzuk J, Cardona R. Evaluation of a Guidelines-Based Approach to the Treatment of Chronic Spontaneous Urticaria. J Allergy Clin Immunol Pract. 2018 Jan-Feb;6(1):177-182.e1. doi: 10.1016/j.jaip.2017.06.002. Epub 2017 Jul 12. PMID: 28709817.

230: Mapel D, Laliberté F, Roberts MH, Sama SR, Sundaresan D, Pilon D, Lefebvre P, Duh MS, Patel J. A retrospective study to assess clinical characteristics and time to initiation of open-triple therapy among patients with chronic obstructive pulmonary disease, newly established on long-acting mono- or combination therapy. Int J Chron Obstruct Pulmon Dis. 2017 Jun 21;12:1825-1836. doi: 10.2147/COPD.S129007. PMID: 28684905; PMCID: PMC5485896.

231: Aalbers R, Park HS. Positioning of Long-Acting Muscarinic Antagonists in the Management of Asthma. Allergy Asthma Immunol Res. 2017 Sep;9(5):386-393. doi: 10.4168/aair.2017.9.5.386. PMID: 28677351; PMCID: PMC5500692.

232: Jabbal S, Manoharan A, Lipworth BJ. Bronchoprotective tolerance with indacaterol is not modified by concomitant tiotropium in persistent asthma. Clin Exp Allergy. 2017 Oct;47(10):1239-1245. doi: 10.1111/cea.12972. Epub 2017 Aug 1. PMID: 28665534.

233: Clarke A, Perry E, Kelly C, De Soyza A, Heesom K, Gold LI, Ollier W, Hutchinson D, Eggleton P. Heightened autoantibody immune response to citrullinated calreticulin in bronchiectasis: Implications for rheumatoid arthritis. Int J Biochem Cell Biol. 2017 Aug;89:199-206. doi: 10.1016/j.biocel.2017.06.013. Epub 2017 Jun 24. PMID: 28652209.

234: Miravitlles M, Anzueto A, Jardim JR. Optimizing bronchodilation in the prevention of COPD exacerbations. Respir Res. 2017 Jun 20;18(1):125. doi: 10.1186/s12931-017-0601-2. PMID: 28633665; PMCID: PMC5477752.

235: Wang G, Wang F, Gibson PG, Guo M, Zhang WJ, Gao P, Zhang HP, Harvey ES, Li H, Zhang J. Severe and uncontrolled asthma in China: a cross-sectional survey from the Australasian Severe Asthma Network. J Thorac Dis. 2017 May;9(5):1333-1344. doi: 10.21037/jtd.2017.04.74. PMID: 28616286; PMCID: PMC5465130.

236: Reddel HK, Valenti L, Easton KL, Gordon J, Bayram C, Miller GC. Assessment and management of asthma and chronic obstructive pulmonary disease in Australian general practice. Aust Fam Physician. 2017 Jun;46(6):413-419. PMID: 28609599.

237: Kew KM, Carr R, Crossingham I. Lay-led and peer support interventions for adolescents with asthma. Cochrane Database Syst Rev. 2017 Apr 19;4(4):CD012331. doi: 10.1002/14651858.CD012331.pub2. PMID: 28421600; PMCID: PMC6478329.

238: Vestbo J, Papi A, Corradi M, Blazhko V, Montagna I, Francisco C, Cohuet G, Vezzoli S, Scuri M, Singh D. Single inhaler extrafine triple therapy versus long-acting muscarinic antagonist therapy for chronic obstructive pulmonary disease (TRINITY): a double-blind, parallel group, randomised controlled trial. Lancet. 2017 May 13;389(10082):1919-1929. doi: 10.1016/S0140-6736(17)30188-5. Epub 2017 Apr 3. PMID: 28385353.

239: Glassberg J, Minnitti C, Cromwell C, Cytryn L, Kraus T, Skloot GS, Connor JT, Rahman AH, Meurer WJ. Inhaled steroids reduce pain and sVCAM levels in individuals with sickle cell disease: A triple-blind, randomized trial. Am J Hematol. 2017 Jul;92(7):622-631. doi: 10.1002/ajh.24742. Epub 2017 Jun 5. PMID: 28370266; PMCID: PMC5484635.

240: Al-Sheyab NA, Khader YS, Shah S, Roydhouse JK, Gallagher R. The Effect of a "Class Smoke Free Pledge" on Breath Carbon Monoxide in Arabic Male Adolescents. Nicotine Tob Res. 2018 Apr 2;20(5):568-574. doi: 10.1093/ntr/ntx050. PMID: 28340136.

241: Morawska A, Mitchell AE, Burgess S, Fraser J. Fathers' Perceptions of Change Following Parenting Intervention: Randomized Controlled Trial of Triple P for Parents of Children With Asthma or Eczema. J Pediatr Psychol. 2017 Aug 1;42(7):792-803. doi: 10.1093/jpepsy/jsw106. PMID: 28339996.

242: Morawska A, Mitchell A, Burgess S, Fraser J. Randomized controlled trial of Triple P for parents of children with asthma or eczema: Effects on parenting and child behavior. J Consult Clin Psychol. 2017 Apr;85(4):283-296. doi: 10.1037/ccp0000177. PMID: 28333531.

243: Cazzola M, Ora J, Rogliani P, Matera MG. Role of muscarinic antagonists in asthma therapy. Expert Rev Respir Med. 2017 Mar;11(3):239-253. doi: 10.1080/17476348.2017.1289844. Epub 2017 Feb 9. PMID: 28140686.

244: Morawska A, Mitchell AE, Burgess S, Fraser J. Corrigendum to "Effects of Triple P parenting intervention on child health outcomes for childhood asthma and eczema: Randomised controlled trial" [Behav. Res. Ther. 83 (2016) 35-44]. Behav Res Ther. 2017 May;92:107. doi: 10.1016/j.brat.2016.12.017. Epub 2017 Jan 24. Erratum for: Behav Res Ther. 2016 Aug;83:35-44. PMID: 28129879.

245: Hamelmann E, Vogelberg C, Szefler SJ. Tiotropium for the treatment of asthma in adolescents. Expert Opin Pharmacother. 2017 Feb;18(3):305-312. doi: 10.1080/14656566.2017.1285906. Epub 2017 Feb 1. PMID: 28110558.

246: Thomson NC. New and developing non-adrenoreceptor small molecule drugs for the treatment of asthma. Expert Opin Pharmacother. 2017 Feb;18(3):283-293. doi: 10.1080/14656566.2017.1284794. Epub 2017 Feb 1. PMID: 28099820.

247: Araújo D, Padrão E, Morais-Almeida M, Cardoso J, Pavão F, Leite RB, Caldas AC, Marques A. Asthma-chronic obstructive pulmonary disease overlap syndrome - Literature review and contributions towards a Portuguese consensus. Rev Port Pneumol (2006). 2017 Mar-Apr;23(2):90-99. doi: 10.1016/j.rppnen.2016.11.005. Epub 2017 Jan 6. PMID: 28089081.

248: Irshad S, Flores-Borja F, Lawler K, Monypenny J, Evans R, Male V, Gordon P, Cheung A, Gazinska P, Noor F, Wong F, Grigoriadis A, Fruhwirth GO, Barber PR, Woodman N, Patel D, Rodriguez-Justo M, Owen J, Martin SG, Pinder SE, Gillett CE, Poland SP, Ameer-Beg S, McCaughan F, Carlin LM, Hasan U, Withers DR, Lane P, Vojnovic B, Quezada SA, Ellis P, Tutt AN, Ng T. RORγt<sup>+</sup> Innate Lymphoid Cells Promote Lymph Node Metastasis of Breast Cancers. Cancer Res. 2017 Mar 1;77(5):1083-1096. doi: 10.1158/0008-5472.CAN-16-0598. Epub 2017 Jan 12. PMID: 28082403.

249: Nejatbakhsh F, Karegar-Borzi H, Amin G, Eslaminejad A, Hosseini M, Bozorgi M, Gharabaghi MA. Squill Oxymel, a traditional formulation from Drimia Maritima (L.) Stearn, as an add-on treatment in patients with moderate to severe persistent asthma: A pilot, triple-blind, randomized clinical trial. J Ethnopharmacol. 2017 Jan 20;196:186-192. doi: 10.1016/j.jep.2016.12.032. Epub 2016 Dec 18. PMID: 27998692.

250: Hoshino M, Ohtawa J, Akitsu K. Effects of the addition of tiotropium on airway dimensions in symptomatic asthma. Allergy Asthma Proc. 2016 Nov;37(6):147-153. doi: 10.2500/aap.2016.37.3991. PMID: 27931291.

251: Albertson TE, Chenoweth JA, Adams JY, Sutter ME. Muscarinic antagonists in early stage clinical development for the treatment of asthma. Expert Opin Investig Drugs. 2017 Jan;26(1):35-49. doi: 10.1080/13543784.2017.1264388. Epub 2016 Dec 7. PMID: 27927039.

252: Edwards SC, Fairbrother SE, Scowcroft A, Chiu G, Ternouth A, Lipworth BJ. The burden of chronic obstructive pulmonary disease associated with maintenance monotherapy in the UK. Int J Chron Obstruct Pulmon Dis. 2016 Nov 22;11:2851-2858. doi: 10.2147/COPD.S109707. PMID: 27920512; PMCID: PMC5125989.

253: Tasanarong P, Dechatiwongse Na Ayudhya T, Techanitiswad T, Koontongkaew S. Reduction of viable bacteria in dentinal tubules treated with a novel medicament (Z-Mix). J Dent Sci. 2016 Dec;11(4):419-426. doi: 10.1016/j.jds.2016.06.006. Epub 2016 Aug 10. PMID: 30895007; PMCID: PMC6395269.

254: Montuschi P, Malerba M, Macis G, Mores N, Santini G. Triple inhaled therapy for chronic obstructive pulmonary disease. Drug Discov Today. 2016 Nov;21(11):1820-1827. doi: 10.1016/j.drudis.2016.07.009. Epub 2016 Jul 21. PMID: 27452453.

255: Page C, Cazzola M. Bifunctional Drugs for the Treatment of Respiratory Diseases. Handb Exp Pharmacol. 2017;237:197-212. doi: 10.1007/164_2016_69. PMID: 27787715.

256: Blom RA, Erni ST, Krempaská K, Schaerer O, van Dijk RM, Amacker M, Moser C, Hall SR, von Garnier C, Blank F. A Triple Co-Culture Model of the Human Respiratory Tract to Study Immune-Modulatory Effects of Liposomes and Virosomes. PLoS One. 2016 Sep 29;11(9):e0163539. doi: 10.1371/journal.pone.0163539. PMID: 27685460; PMCID: PMC5042471.

257: Halpin DM. Tiotropium in asthma: what is the evidence and how does it fit in? World Allergy Organ J. 2016 Sep 14;9(1):29. doi: 10.1186/s40413-016-0119-y. PMID: 27679681; PMCID: PMC5022240.

258: Vogelberg C. Tiotropium in the add-on treatment of asthma in adults: clinical trial evidence and experience. Ther Adv Respir Dis. 2016 Dec;10(6):525-533. doi: 10.1177/1753465816662571. Epub 2016 Sep 9. PMID: 27612491; PMCID: PMC5933593.

259: Singh D, Papi A, Corradi M, Pavlišová I, Montagna I, Francisco C, Cohuet G, Vezzoli S, Scuri M, Vestbo J. Single inhaler triple therapy versus inhaled corticosteroid plus long-acting β2-agonist therapy for chronic obstructive pulmonary disease (TRILOGY): a double-blind, parallel group, randomised controlled trial. Lancet. 2016 Sep 3;388(10048):963-73. doi: 10.1016/S0140-6736(16)31354-X. Epub 2016 Sep 1. PMID: 27598678.

260: Kerstjens HA, Moroni-Zentgraf P, Tashkin DP, Dahl R, Paggiaro P, Vandewalker M, Schmidt H, Engel M, Bateman ED. Tiotropium improves lung function, exacerbation rate, and asthma control, independent of baseline characteristics including age, degree of airway obstruction, and allergic status. Respir Med. 2016 Aug;117:198-206. doi: 10.1016/j.rmed.2016.06.013. Epub 2016 Jun 14. PMID: 27492532.

261: Morawska A, Mitchell AE, Burgess S, Fraser J. Effects of Triple P parenting intervention on child health outcomes for childhood asthma and eczema: Randomised controlled trial. Behav Res Ther. 2016 Aug;83:35-44. doi: 10.1016/j.brat.2016.06.001. Epub 2016 Jun 3. Erratum in: Behav Res Ther. 2017 May;92 :107. PMID: 27295179.

262: Zhou T, Zeng D, Zhao T, Yang Y, Liu S, Wu J, Xu L, Tan W. In vivo metabolism study of (R)-bambuterol in humans using ultra high performance liquid chromatography with tandem mass spectrometry. J Sep Sci. 2016 Aug;39(15):2896-906. doi: 10.1002/jssc.201600424. Epub 2016 Jun 27. PMID: 27273913.

263: Shibata Y. [Role of ICS/LABA on COPD treatment]. Nihon Rinsho. 2016 May;74(5):827-32. Japanese. PMID: 27254954.

264: Banerji D, Mahler DA, Hanania NA. Efficacy and safety of LABA/LAMA fixed- dose combinations approved in the US for the management of COPD. Expert Rev Respir Med. 2016 Jul;10(7):767-80. doi: 10.1080/17476348.2016.1190276. Epub 2016 May 30. PMID: 27223863.

265: Mariotti F, Ciurlia G, Spaccapelo L, Muraro A, Acerbi D. A Two-Period Open- Label, Single-Dose Crossover Study in Healthy Volunteers to Evaluate the Drug- Drug Interaction Between Cimetidine and Inhaled Extrafine CHF 5993. Eur J Drug Metab Pharmacokinet. 2017 Apr;42(2):269-279. doi: 10.1007/s13318-016-0345-2. PMID: 27209586; PMCID: PMC5340825.

266: Lichtveld M, Kennedy S, Krouse RZ, Grimsley F, El-Dahr J, Bordelon K, Sterling Y, White L, Barlow N, DeGruy S, Paul D, Denham S, Hayes C, Sanders M, Mvula MM, Thornton E, Chulada P, Mitchell H, Martin WJ 2nd, Stephens KU, Cohn RD. From Design to Dissemination: Implementing Community-Based Participatory Research in Postdisaster Communities. Am J Public Health. 2016 Jul;106(7):1235-42. doi: 10.2105/AJPH.2016.303169. Epub 2016 May 19. PMID: 27196662; PMCID: PMC4984744.

267: Patra J, Maher YI, Mishra S, Bhatia M, Alam D, Malini DS, Gupta PC, Jha P. Effects of body mass index, tobacco smoking, alcohol drinking and solid fuel use on the risk of asthma: Individual Participant Data (IPD) meta-analysis of 175 000 individuals from 51 nationally representative surveys. BMJ Open Respir Res. 2016 Apr 4;3(1):e000121. doi: 10.1136/bmjresp-2015-000121. PMID: 27099758; PMCID: PMC4823466.

268: Abdel-Hameed EA, Rouster SD, Ji H, Ulm A, Hetta HF, Anwar N, Sherman KE, Shata MT. Evaluating the Role of Cellular Immune Responses in the Emergence of HCV NS3 Resistance Mutations During Protease Inhibitor Therapy. Viral Immunol. 2016 May;29(4):252-8. doi: 10.1089/vim.2015.0093. Epub 2016 Feb 17. PMID: 26885675; PMCID: PMC4860622.

269: Busch R, Han MK, Bowler RP, Dransfield MT, Wells JM, Regan EA, Hersh CP; COPDGene Investigators. Risk factors for COPD exacerbations in inhaled medication users: the COPDGene study biannual longitudinal follow-up prospective cohort. BMC Pulm Med. 2016 Feb 10;16:28. doi: 10.1186/s12890-016-0191-7. PMID: 26861867; PMCID: PMC4748594.

270: Mantuani D, Frazee BW, Fahimi J, Nagdev A. Point-of-Care Multi-Organ Ultrasound Improves Diagnostic Accuracy in Adults Presenting to the Emergency Department with Acute Dyspnea. West J Emerg Med. 2016 Jan;17(1):46-53. doi: 10.5811/westjem.2015.11.28525. Epub 2016 Jan 12. PMID: 26823930; PMCID: PMC4729418.

271: Kew KM, Dahri K. Long-acting muscarinic antagonists (LAMA) added to combination long-acting beta2-agonists and inhaled corticosteroids (LABA/ICS) versus LABA/ICS for adults with asthma. Cochrane Database Syst Rev. 2016 Jan 21;(1):CD011721. doi: 10.1002/14651858.CD011721.pub2. PMID: 26798035.

272: Wang K, Tian P, Fan Y, Wang Y, Liu C. Assessment of second-line treatments for patients with uncontrolled moderate asthma. Int J Clin Exp Med. 2015 Oct 15;8(10):19476-80. PMID: 26770595; PMCID: PMC4694495.

273: Kim SA, Lee JH, Kim EK, Kim TH, Kim WJ, Lee JH, Yoon HI, Baek S, Lee JS, Oh YM, Lee SD. Outcome of Inhaler Withdrawal in Patients Receiving Triple Therapy for COPD. Tuberc Respir Dis (Seoul). 2016 Jan;79(1):22-30. doi: 10.4046/trd.2016.79.1.22. Epub 2015 Dec 31. Erratum in: Tuberc Respir Dis (Seoul). 2016 Jul;79(3):193. PMID: 26770231; PMCID: PMC4701790.

274: Barrecheguren M, Monteagudo M, Ferrer J, Borrell E, Llor C, Esquinas C, Miravitlles M. Treatment patterns in COPD patients newly diagnosed in primary care. A population-based study. Respir Med. 2016 Feb;111:47-53. doi: 10.1016/j.rmed.2015.12.004. Epub 2015 Dec 23. PMID: 26758585.

275: Covelli H, Pek B, Schenkenberger I, Scott-Wilson C, Emmett A, Crim C. Efficacy and safety of fluticasone furoate/vilanterol or tiotropium in subjects with COPD at cardiovascular risk. Int J Chron Obstruct Pulmon Dis. 2015 Dec 18;11:1-12. doi: 10.2147/COPD.S91407. PMID: 26730183; PMCID: PMC4694692.

276: Woodfolk JA, Glesner J, Wright PW, Kepley CL, Li M, Himly M, Muehling LM, Gustchina A, Wlodawer A, Chapman MD, Pomés A. Antigenic Determinants of the Bilobal Cockroach Allergen Bla g 2. J Biol Chem. 2016 Jan 29;291(5):2288-301. doi: 10.1074/jbc.M115.702324. Epub 2015 Dec 7. PMID: 26644466; PMCID: PMC4732212.

277: Vogelberg C. Emerging role of long-acting anticholinergics in children with asthma. Curr Opin Pulm Med. 2016 Jan;22(1):74-9. doi: 10.1097/MCP.0000000000000229. PMID: 26606079.

278: Pizzichini MM, Kerstjens HA, Pizzichini E. Current role of anticholinergic drugs in the treatment of asthma: key messages for clinical practice. Pol Arch Med Wewn. 2015;125(11):859-66. doi: 10.20452/pamw.3168. Epub 2015 Oct 30. Erratum in: Pol Arch Med Wewn. 2015;125(12):954. PMID: 26529261.

279: Brusselle G, Price D, Gruffydd-Jones K, Miravitlles M, Keininger DL, Stewart R, Baldwin M, Jones RC. The inevitable drift to triple therapy in COPD: an analysis of prescribing pathways in the UK. Int J Chron Obstruct Pulmon Dis. 2015 Oct 15;10:2207-17. doi: 10.2147/COPD.S91694. PMID: 26527869; PMCID: PMC4621207.

280: Wechsler ME, Yawn BP, Fuhlbrigge AL, Pace WD, Pencina MJ, Doros G, Kazani S, Raby BA, Lanzillotti J, Madison S, Israel E; BELT Investigators. Anticholinergic vs Long-Acting β-Agonist in Combination With Inhaled Corticosteroids in Black Adults With Asthma: The BELT Randomized Clinical Trial. JAMA. 2015 Oct 27;314(16):1720-30. doi: 10.1001/jama.2015.13277. PMID: 26505596.

281: Tilp C, Bucher H, Haas H, Duechs MJ, Wex E, Erb KJ. Effects of conventional tobacco smoke and nicotine-free cigarette smoke on airway inflammation, airway remodelling and lung function in a triple allergen model of severe asthma. Clin Exp Allergy. 2016 Jul;46(7):957-72. doi: 10.1111/cea.12665. Epub 2016 May 3. PMID: 26502779.

282: Trudo F, Kern DM, Davis JR, Tunceli O, Zhou S, Graham EL, Strange C, Williams SA. Comparative effectiveness of budesonide/formoterol combination and tiotropium bromide among COPD patients new to these controller treatments. Int J Chron Obstruct Pulmon Dis. 2015 Sep 28;10:2055-66. doi: 10.2147/COPD.S90658. PMID: 26451101; PMCID: PMC4592033.

283: Hamilton M, Leggett R, Pang C, Charles S, Gillett B, Prime D. In Vitro Dosing Performance of the ELLIPTA® Dry Powder Inhaler Using Asthma and COPD Patient Inhalation Profiles Replicated with the Electronic Lung (eLung™). J Aerosol Med Pulm Drug Deliv. 2015 Dec;28(6):498-506. doi: 10.1089/jamp.2015.1225. Epub 2015 Sep 15. PMID: 26372465; PMCID: PMC4685503.

284: Barnes PJ. Therapeutic approaches to asthma-chronic obstructive pulmonary disease overlap syndromes. J Allergy Clin Immunol. 2015 Sep;136(3):531-45. doi: 10.1016/j.jaci.2015.05.052. PMID: 26343937.

285: Bouwmeester C, Kraft J, Bungay KM. Optimizing inhaler use by pharmacist- provided education to community-dwelling elderly. Respir Med. 2015 Oct;109(10):1363-8. doi: 10.1016/j.rmed.2015.07.013. Epub 2015 Jul 20. PMID: 26341546.

286: Anderson DE, Kew KM, Boyter AC. Long-acting muscarinic antagonists (LAMA) added to inhaled corticosteroids (ICS) versus the same dose of ICS alone for adults with asthma. Cochrane Database Syst Rev. 2015 Aug 24;2015(8):CD011397. doi: 10.1002/14651858.CD011397.pub2. PMID: 26301488; PMCID: PMC8666145.

287: Miravitlles M, Alcázar B, Alvarez FJ, Bazús T, Calle M, Casanova C, Cisneros C, de-Torres JP, Entrenas LM, Esteban C, García-Sidro P, Cosio BG, Huerta A, Iriberri M, Izquierdo JL, López-Viña A, López-Campos JL, Martínez- Moragón E, Pérez de Llano L, Perpiñá M, Ros JA, Serrano J, Soler-Cataluña JJ, Torrego A, Urrutia I, Plaza V. What pulmonologists think about the asthma-COPD overlap syndrome. Int J Chron Obstruct Pulmon Dis. 2015 Jul 15;10:1321-30. doi: 10.2147/COPD.S88667. PMID: 26270415; PMCID: PMC4507793.

288: Wang Y, Qin F, Xiong Z, Fu X, Ma C. An LC-MS/MS method for simultaneous determination of trantinterol and its major metabolite in rat plasma and its application to a comparative pharmacokinetic study. J Chromatogr B Analyt Technol Biomed Life Sci. 2015 Sep 1;1000:163-8. doi: 10.1016/j.jchromb.2015.07.022. Epub 2015 Jul 17. PMID: 26245359.

289: Itadani S, Yashiro K, Aratani Y, Sekiguchi T, Kinoshita A, Moriguchi H, Ohta N, Takahashi S, Ishida A, Tajima Y, Hisaichi K, Ima M, Ueda J, Egashira H, Sekioka T, Kadode M, Yonetomi Y, Nakao T, Inoue A, Nomura H, Kitamine T, Fujita M, Nabe T, Yamaura Y, Matsumura N, Imagawa A, Nakayama Y, Takeuchi J, Ohmoto K. Discovery of Gemilukast (ONO-6950), a Dual CysLT1 and CysLT2 Antagonist As a Therapeutic Agent for Asthma. J Med Chem. 2015 Aug 13;58(15):6093-113. doi: 10.1021/acs.jmedchem.5b00741. Epub 2015 Jul 22. PMID: 26200813.

290: Norman P. Developments in inhaled combination therapies: patent activity 2013-2014. Expert Opin Ther Pat. 2015;25(11):1239-45. doi: 10.1517/13543776.2015.1064394. Epub 2015 Jul 2. PMID: 26135360. 291: Bood JR, Sundblad BM, Delin I, Sjödin M, Larsson K, Anderson SD, Wheelock CE, Dahlén SE, Dahlén B. Urinary excretion of lipid mediators in response to repeated eucapnic voluntary hyperpnea in asthmatic subjects. J Appl Physiol (1985). 2015 Aug 1;119(3):272-9. doi: 10.1152/japplphysiol.00301.2015. Epub 2015 Jun 25. PMID: 26112240.

292: Mahler DA, Kerstjens HA, Donohue JF, Buhl R, Lawrence D, Altman P. Indacaterol vs tiotropium in COPD patients classified as GOLD A and B. Respir Med. 2015 Aug;109(8):1031-9. doi: 10.1016/j.rmed.2015.05.012. Epub 2015 May 22. PMID: 26094050.

293: Miyazaki M, Nakamura H, Takahashi S, Chubachi S, Sasaki M, Haraguchi M, Terai H, Ishii M, Fukunaga K, Tasaka S, Soejima K, Asano K, Betsuyaku T; Keio COPD Comorbidity Research (K-CCR) group. The reasons for triple therapy in stable COPD patients in Japanese clinical practice. Int J Chron Obstruct Pulmon Dis. 2015 Jun 4;10:1053-9. doi: 10.2147/COPD.S79864. PMID: 26082629; PMCID: PMC4461139.

294: Kew KM, Evans DJ, Allison DE, Boyter AC. Long-acting muscarinic antagonists (LAMA) added to inhaled corticosteroids (ICS) versus addition of long-acting beta2-agonists (LABA) for adults with asthma. Cochrane Database Syst Rev. 2015 Jun 2;2015(6):CD011438. doi: 10.1002/14651858.CD011438.pub2. PMID: 26031392; PMCID: PMC6513433.

295: Matsuse H, Yamagishi T, Kodaka N, Miura A, Kurose Y, Nakano C, Oshio T. Tiotropium bromide as add-on therapy to inhaled corticosteroids for treating asthma. Expert Opin Pharmacother. 2015 Jun;16(9):1403-9. doi: 10.1517/14656566.2015.1045877. PMID: 26001185.

296: Quirce S, Domínguez-Ortega J, Barranco P. Anticholinergics for treatment of asthma. J Investig Allergol Clin Immunol. 2015;25(2):84-93; quiz 94-5. PMID: 25997301.

297: Chen Y, Guo J, Tang Y, Wu L, Tao W, Qian Y, Duan JA. Pharmacokinetic profile and metabolite identification of yuanhuapine, a bioactive component in Daphne genkwa by ultra-high performance liquid chromatography coupled with tandem mass spectrometry. J Pharm Biomed Anal. 2015 Aug 10;112:60-9. doi: 10.1016/j.jpba.2015.04.023. Epub 2015 Apr 25. PMID: 25956226.

298: McKeage K. Tiotropium Respimat®: A Review of Its Use in Asthma Poorly Controlled with Inhaled Corticosteroids and Long-Acting β2-Adrenergic Agonists. Drugs. 2015 May;75(7):809-16. doi: 10.1007/s40265-015-0393-y. PMID: 25895466.

299: Ohta K, Ichinose M, Tohda Y, Engel M, Moroni-Zentgraf P, Kunimitsu S, Sakamoto W, Adachi M. Long-Term Once-Daily Tiotropium Respimat® Is Well Tolerated and Maintains Efficacy over 52 Weeks in Patients with Symptomatic Asthma in Japan: A Randomised, Placebo-Controlled Study. PLoS One. 2015 Apr 20;10(4):e0124109. doi: 10.1371/journal.pone.0124109. PMID: 25894430; PMCID: PMC4404354.

300: Frith PA, Thompson PJ, Ratnavadivel R, Chang CL, Bremner P, Day P, Frenzel C, Kurstjens N; Glisten Study Group. Glycopyrronium once-daily significantly improves lung function and health status when combined with salmeterol/fluticasone in patients with COPD: the GLISTEN study, a randomised controlled trial. Thorax. 2015 Jun;70(6):519-27. doi: 10.1136/thoraxjnl-2014-206670. Epub 2015 Apr 3. PMID: 25841237; PMCID: PMC4453631.

301: Bernstein JA, Moellman JJ, Collins SP, Hart KW, Lindsell CJ. Effectiveness of ecallantide in treating angiotensin-converting enzyme inhibitor-induced angioedema in the emergency department. Ann Allergy Asthma Immunol. 2015 Mar;114(3):245-9. doi: 10.1016/j.anai.2014.12.007. Epub 2015 Jan 16. PMID: 25601538.

302: Kankaanranta H, Harju T, Kilpeläinen M, Mazur W, Lehto JT, Katajisto M, Peisa T, Meinander T, Lehtimäki L. Diagnosis and pharmacotherapy of stable chronic obstructive pulmonary disease: the finnish guidelines. Basic Clin Pharmacol Toxicol. 2015 Apr;116(4):291-307. doi: 10.1111/bcpt.12366. Epub 2015 Jan 22. PMID: 25515181; PMCID: PMC4409821.

303: Salmon M, Tannheimer SL, Gentzler TT, Cui ZH, Sorensen EA, Hartsough KC, Kim M, Purvis LJ, Barrett EG, McDonald JD, Rudolph K, Doyle-Eisele M, Kuehl PJ, Royer CM, Baker WR, Phillips GB, Wright CD. The in vivo efficacy and side effect pharmacology of GS-5759, a novel bifunctional phosphodiesterase 4 inhibitor and long-acting β 2-adrenoceptor agonist in preclinical animal species. Pharmacol Res Perspect. 2014 Aug;2(4):e00046. doi: 10.1002/prp2.46. Epub 2014 Jun 9. PMID: 25505595; PMCID: PMC4186437.

304: Lee LA, Yang S, Kerwin E, Trivedi R, Edwards LD, Pascoe S. The effect of fluticasone furoate/umeclidinium in adult patients with asthma: a randomized, dose-ranging study. Respir Med. 2015 Jan;109(1):54-62. doi: 10.1016/j.rmed.2014.09.012. Epub 2014 Oct 2. PMID: 25452139.

305: Latorre M, Novelli F, Vagaggini B, Braido F, Papi A, Sanduzzi A, Santus P, Scichilone N, Paggiaro P. Differences in the efficacy and safety among inhaled corticosteroids (ICS)/long-acting beta2-agonists (LABA) combinations in the treatment of chronic obstructive pulmonary disease (COPD): Role of ICS. Pulm Pharmacol Ther. 2015 Feb;30:44-50. doi: 10.1016/j.pupt.2014.10.006. Epub 2014 Nov 6. PMID: 25445928.

306: Abadoglu O, Berk S. Tiotropium may improve asthma symptoms and lung function in asthmatic patients with irreversible airway obstruction: the real- life data. Clin Respir J. 2016 Jul;10(4):421-7. doi: 10.1111/crj.12230. Epub 2014 Nov 9. PMID: 25335652.

307: Otim ME, Jayasinha R, Forbes H, Shah S. Building evidence for peer-led interventions: assessing the cost of the Adolescent Asthma Action program in Australia. Aust J Prim Health. 2015;21(4):438-43. doi: 10.1071/PY14066. PMID: 25230153.

308: Price D, Fromer L, Kaplan A, van der Molen T, Román-Rodríguez M. Is there a rationale and role for long-acting anticholinergic bronchodilators in asthma? NPJ Prim Care Respir Med. 2014 Jul 17;24:14023. doi: 10.1038/npjpcrm.2014.23. PMID: 25030457; PMCID: PMC4373380.

309: Ciprandi G, Schiavetti I, Bellezza Fontana R, Sorbello V, Ricciardolo FL. Overweight and obesity as risk factors for impaired lung function in patients with asthma: A real-life experience. Allergy Asthma Proc. 2014 Jul- Aug;35(4):e62-71. doi: 10.2500/aap.2014.35.3773. PMID: 24992544.

310: Willson J, Bateman ED, Pavord I, Lloyd A, Krivasi T, Esser D. Cost effectiveness of tiotropium in patients with asthma poorly controlled on inhaled glucocorticosteroids and long-acting β-agonists. Appl Health Econ Health Policy. 2014 Aug;12(4):447-59. doi: 10.1007/s40258-014-0107-8. Erratum in: Appl Health Econ Health Policy. 2016 Feb;14(1):119-25. PMID: 24974107.

311: Tan C, Gao D, Zhang C, Fu Y, Wang BK, Zhu Q, Wang YP. [Research on correlation between lung and large intestine based on meridian and acupoint palpation in patients with bronchial asthma]. Zhongguo Zhen Jiu. 2014 Feb;34(2):145-8. Chinese. PMID: 24796049.

312: Novelli F, Costa F, Latorre M, Malagrinò L, Celi A, Vagaggini B, Paggiaro P. Tiotropium: a new therapeutic option in asthma. Monaldi Arch Chest Dis. 2013 Sep-Dec;79(3-4):109-15. doi: 10.4081/monaldi.2013.5208. PMID: 24761528.

313: Gray TA, Alsamman K, Murray E, Sims AH, Hupp TR. Engineering a synthetic cell panel to identify signalling components reprogrammed by the cell growth regulator anterior gradient-2. Mol Biosyst. 2014 Jun;10(6):1409-25. doi: 10.1039/c4mb00113c. Epub 2014 Apr 7. PMID: 24710632.

314: Page C, Cazzola M. Bifunctional drugs for the treatment of asthma and chronic obstructive pulmonary disease. Eur Respir J. 2014 Aug;44(2):475-82. doi: 10.1183/09031936.00003814. Epub 2014 Apr 2. PMID: 24696121.

315: Duechs MJ, Tilp C, Tomsic C, Gantner F, Erb KJ. Development of a novel severe triple allergen asthma model in mice which is resistant to dexamethasone and partially resistant to TLR7 and TLR9 agonist treatment. PLoS One. 2014 Mar 11;9(3):e91223. doi: 10.1371/journal.pone.0091223. PMID: 24618687; PMCID: PMC3949744.

316: Befekadu E, Onofrei C, Colice GL. Tiotropium in asthma: a systematic review. J Asthma Allergy. 2014 Feb 27;7:11-21. doi: 10.2147/JAA.S38841. PMID: 24600237; PMCID: PMC3942115.

317: Rorie A, Goldner WS, Lyden E, Poole JA. Beneficial role for supplemental vitamin D3 treatment in chronic urticaria: a randomized study. Ann Allergy Asthma Immunol. 2014 Apr;112(4):376-82. doi: 10.1016/j.anai.2014.01.010. Epub 2014 Feb 5. PMID: 24507460.

318: Todorova M, Trendafilova A. Sideritis scardica Griseb., an endemic species of Balkan peninsula: traditional uses, cultivation, chemical composition, biological activity. J Ethnopharmacol. 2014 Mar 14;152(2):256-65. doi: 10.1016/j.jep.2014.01.022. Epub 2014 Jan 30. PMID: 24487281.

319: Gruba SM, Meyer AF, Manning BM, Wang Y, Thompson JW, Dalluge JJ, Haynes CL. Time- and concentration-dependent effects of exogenous serotonin and inflammatory cytokines on mast cell function. ACS Chem Biol. 2014 Feb 21;9(2):503-9. doi: 10.1021/cb400787s. Epub 2013 Dec 19. PMID: 24304209; PMCID: PMC4083829.

320: Suijkerbuijk AW, de Wit GA, Wijga AH, Heijmans M, Hoogendoorn M, Rutten-van Mölken M, Maurits EE, Hoogenveen RT, Feenstra TL. Maatschappelijke kosten van astma, COPD en respiratoire allergie [Societal costs of asthma, COPD and respiratory allergy]. Ned Tijdschr Geneeskd. 2013;157(46):A6562. Dutch. PMID: 24220178.

321: Peters SP, Bleecker ER, Kunselman SJ, Icitovic N, Moore WC, Pascual R, Ameredes BT, Boushey HA, Calhoun WJ, Castro M, Cherniack RM, Craig T, Denlinger LC, Engle LL, Dimango EA, Israel E, Kraft M, Lazarus SC, Lemanske RF Jr, Lugogo N, Martin RJ, Meyers DA, Ramsdell J, Sorkness CA, Sutherland ER, Wasserman SI, Walter MJ, Wechsler ME, Chinchilli VM, Szefler SJ; National Heart, Lung, and Blood Institute's Asthma Clinical Research Network. Predictors of response to tiotropium versus salmeterol in asthmatic adults. J Allergy Clin Immunol. 2013 Nov;132(5):1068-1074.e1. doi: 10.1016/j.jaci.2013.08.003. Epub 2013 Sep 29. PMID: 24084072; PMCID: PMC3826080.

322: Park GY, Lee YG, Berdyshev E, Nyenhuis S, Du J, Fu P, Gorshkova IA, Li Y, Chung S, Karpurapu M, Deng J, Ranjan R, Xiao L, Jaffe HA, Corbridge SJ, Kelly EA, Jarjour NN, Chun J, Prestwich GD, Kaffe E, Ninou I, Aidinis V, Morris AJ, Smyth SS, Ackerman SJ, Natarajan V, Christman JW. Autotaxin production of lysophosphatidic acid mediates allergic asthmatic inflammation. Am J Respir Crit Care Med. 2013 Oct 15;188(8):928-40. doi: 10.1164/rccm.201306-1014OC. PMID: 24050723; PMCID: PMC3826286.

323: Morphew T, Scott L, Li M, Galant SP, Wong W, Garcia Lloret MI, Jones F, Bollinger ME, Jones CA. Mobile health care operations and return on investment in predominantly underserved children with asthma: the breathmobile program. Popul Health Manag. 2013 Aug;16(4):261-9. doi: 10.1089/pop.2012.0060. PMID: 23941048.

324: Anderson WJ, Short PM, Williamson PA, Morrison AE, Palmer C, Tavendale R, Lipworth BJ. Proof-of-concept evaluation of trough airway hyper-responsiveness following regular racemic or levosalbutamol in genotype-stratified steroid- treated persistent asthmatic patients. Clin Sci (Lond). 2014 Jan 1;126(1):75-83. doi: 10.1042/CS20130213. PMID: 23829494.

325: Riley JP, Fuchs B, Sjöberg L, Nilsson GP, Karlsson L, Dahlén SE, Rao NL, Adner M. Mast cell mediators cause early allergic bronchoconstriction in guinea- pigs in vivo: a model of relevance to asthma. Clin Sci (Lond). 2013 Dec;125(11):533-42. doi: 10.1042/CS20130092. PMID: 23799245.

326: Guyer AC, Long AA. Long-acting anticholinergics in the treatment of asthma. Curr Opin Allergy Clin Immunol. 2013 Aug;13(4):392-8. doi: 10.1097/ACI.0b013e328362a775. PMID: 23756872.

327: Clarke SA, Calam R, Morawska A, Sanders M. Developing web-based Triple P 'Positive Parenting Programme' for families of children with asthma. Child Care Health Dev. 2014 Jul;40(4):492-7. doi: 10.1111/cch.12073. Epub 2013 May 12. Erratum in: Child Care Health Dev. 2015 May;41(3):503. PMID: 23662595.

328: Caffarelli C, Santamaria F, Vottero A, Bernasconi S. Progress in Pediatrics in 2012: choices in allergy, endocrinology, gastroenterology, hematology, infectious diseases, neurology, nutrition and respiratory tract illnesses. Ital J Pediatr. 2013 May 8;39:26. doi: 10.1186/1824-7288-39-26. PMID: 23651601; PMCID: PMC3660281.

329: Bollmeier SG, Lee SY. The emerging role of tiotropium for patients with asthma. Ann Pharmacother. 2013 May;47(5):704-13. doi: 10.1345/aph.1R641. Epub 2013 Apr 23. PMID: 23613100.

330: Rand TG, Robbins C, Rajaraman D, Sun M, Miller JD. Induction of Dectin-1 and asthma-associated signal transduction pathways in RAW 264.7 cells by a triple-helical (1, 3)-β-D glucan, curdlan. Arch Toxicol. 2013 Oct;87(10):1841-50. doi: 10.1007/s00204-013-1042-4. Epub 2013 Mar 30. PMID: 23543010. 331: Lipworth BJ. Emerging role of long acting muscarinic antagonists for asthma. Br J Clin Pharmacol. 2014 Jan;77(1):55-62. doi: 10.1111/bcp.12123. PMID: 23534447; PMCID: PMC3895347.

332: Amin M, Anwar F, Naz F, Mehmood T, Saari N. Anti-Helicobacter pylori and urease inhibition activities of some traditional medicinal plants. Molecules. 2013 Feb 7;18(2):2135-49. doi: 10.3390/molecules18022135. PMID: 23434867; PMCID: PMC6270356.

333: Sjåheim TB, Bjørtuft Ø, Drabløs PA, Kongerud J, Halstensen TS. Increased bronchial density of CD25+Foxp3+ regulatory T cells in occupational asthma: relationship to current smoking. Scand J Immunol. 2013 May;77(5):398-404. doi: 10.1111/sji.12035. PMID: 23421612.

334: Newcomb DC, Boswell MG, Sherrill TP, Polosukhin VV, Boyd KL, Goleniewska K, Brody SL, Kolls JK, Adler KB, Peebles RS Jr. IL-17A induces signal transducers and activators of transcription-6-independent airway mucous cell metaplasia. Am J Respir Cell Mol Biol. 2013 Jun;48(6):711-6. doi: 10.1165/rcmb.2013-0017OC. PMID: 23392574; PMCID: PMC3727878.

335: Peters SP. Tiotropium bromide triple combination therapy improves lung function and decreases asthma exacerbations. Evid Based Med. 2013 Oct;18(5):179. doi: 10.1136/eb-2012-101100. Epub 2013 Jan 24. PMID: 23349214.

336: Zarowitz BJ, O'Shea T. Chronic obstructive pulmonary disease: prevalence, characteristics, and pharmacologic treatment in nursing home residents with cognitive impairment. J Manag Care Pharm. 2012 Oct;18(8):598-606. doi: 10.18553/jmcp.2012.18.8.598. PMID: 23127147.

337: Adi H, Young PM, Traini D. Co-deposition of a triple therapy drug formulation for the treatment of chronic obstructive pulmonary disease using solution-based pressurised metered dose inhalers. J Pharm Pharmacol. 2012 Sep;64(9):1245-53. doi: 10.1111/j.2042-7158.2011.01370.x. Epub 2011 Oct 27. PMID: 22881437.

338: Al-Sheyab NA, Gallagher R, Roydhouse JK, Crisp J, Shah S. Feasibility of a peer-led, school-based asthma education programme for adolescents in Jordan. East Mediterr Health J. 2012 May;18(5):468-73. doi: 10.26719/2012.18.5.468. PMID: 22764433.

339: Vollmer WM, Feldstein A, Smith DH, Dubanoski JP, Waterbury A, Schneider JL, Clark SA, Rand C. Use of health information technology to improve medication adherence. Am J Manag Care. 2011 Dec;17(12 Spec No.):SP79-87. PMID: 22216772; PMCID: PMC3641901.

340: MacSharry J, O'Mahony C, Shalaby KH, Sheil B, Karmouty-Quintana H, Shanahan F, Martin JG. Immunomodulatory effects of feeding with Bifidobacterium longum on allergen-induced lung inflammation in the mouse. Pulm Pharmacol Ther. 2012 Aug;25(4):325-34. doi: 10.1016/j.pupt.2012.05.011. Epub 2012 Jun 13. PMID: 22705947.

341: Bjerg A, Lundbäck B, Lötvall J. The future of combining inhaled drugs for COPD. Curr Opin Pharmacol. 2012 Jun;12(3):252-5. doi: 10.1016/j.coph.2012.03.004. Epub 2012 Mar 30. PMID: 22465638.

342: Soler-Cataluña JJ, Cosío B, Izquierdo JL, López-Campos JL, Marín JM, Agüero R, Baloira A, Carrizo S, Esteban C, Galdiz JB, González MC, Miravitlles M, Monsó E, Montemayor T, Morera J, Ortega F, Peces-Barba G, Puente L, Rodríguez JM, Sala E, Sauleda J, Soriano JB, Viejo JL. Consensus document on the overlap phenotype COPD-asthma in COPD. Arch Bronconeumol. 2012 Sep;48(9):331-7. English, Spanish. doi: 10.1016/j.arbres.2011.12.009. Epub 2012 Feb 15. PMID: 22341911.

343: Hirsch R, Deng H, Laohachai MN. Azithromycin in periodontal treatment: more than an antibiotic. J Periodontal Res. 2012 Apr;47(2):137-48. doi: 10.1111/j.1600-0765.2011.01418.x. Epub 2011 Nov 4. PMID: 22050485.

344: Lechuga-Ballesteros D, Noga B, Vehring R, Cummings RH, Dwivedi SK. Novel cosuspension metered-dose inhalers for the combination therapy of chronic obstructive pulmonary disease and asthma. Future Med Chem. 2011 Oct;3(13):1703-18. doi: 10.4155/fmc.11.133. PMID: 21942257.

345: Banerjee ER. Triple selectin knockout (ELP-/-) mice fail to develop OVA- induced acute asthma phenotype. J Inflamm (Lond). 2011 Aug 11;8:19. doi: 10.1186/1476-9255-8-19. PMID: 21835035; PMCID: PMC3170177.

346: Feng L, Zhang Y, Chen R, Hao Y. The Chinese version of the Pediatric Quality of Life Inventory™ (PedsQL™) 3.0 Asthma Module: reliability and validity. Health Qual Life Outcomes. 2011 Aug 7;9:64. doi: 10.1186/1477-7525-9-64. PMID: 21819618; PMCID: PMC3161836.

347: Short PM, Williamson PA, Elder DHJ, Lipworth SIW, Schembri S, Lipworth BJ. The impact of tiotropium on mortality and exacerbations when added to inhaled corticosteroids and long-acting β-agonist therapy in COPD. Chest. 2012 Jan;141(1):81-86. doi: 10.1378/chest.11-0038. Epub 2011 Jul 28. PMID: 21799028.

348: Hagan JB, Taylor RL, Kita H, Singh RJ. Analysis of fluticasone propionate in induced sputum by mass spectrometry. Allergy Asthma Proc. 2011 Jul- Aug;32(4):18-21. doi: 10.2500/aap.2011.32.3454. PMID: 21781401.

349: Barnes PJ. Triple inhalers for obstructive airways disease: will they be useful? Expert Rev Respir Med. 2011 Jun;5(3):297-300. doi: 10.1586/ers.11.26. PMID: 21702649.

350: Sung CC, Chi H, Chiu NC, Huang DT, Weng LC, Wang NY, Huang FY. Viral etiology of acute lower respiratory tract infections in hospitalized young children in Northern Taiwan. J Microbiol Immunol Infect. 2011 Jun;44(3):184-90. doi: 10.1016/j.jmii.2011.01.025. Epub 2011 Jan 18. PMID: 21524612; PMCID: PMC7105033.

351: Saini B, Shah S, Kearey P, Bosnic-Anticevich S, Grootjans J, Armour C. An interprofessional learning module on asthma health promotion. Am J Pharm Educ. 2011 Mar 10;75(2):30. doi: 10.5688/ajpe75230. PMID: 21519420; PMCID: PMC3073104.

352: Cazzola M, Segreti A, Bettoncelli G, Calzetta L, Cricelli C, Pasqua F, Rogliani P. Change in asthma and COPD prescribing by Italian general practitioners between 2006 and 2008. Prim Care Respir J. 2011 Sep;20(3):291-8. doi: 10.4104/pcrj.2011.00033. PMID: 21509419; PMCID: PMC6549849.

353: Jonas DE, Wines RCM, DelMonte M, Amick HR, Wilkins TM, Einerson BD, Schuler CL, Wynia BA, Shilliday BB. Drug Class Review: Controller Medications for Asthma: Final Update 1 Report [Internet]. Portland (OR): Oregon Health & Science University; 2011 Apr. PMID: 22132427.

354: Chen R, Hao Y, Feng L, Zhang Y, Huang Z. The Chinese version of the Pediatric Quality of Life Inventory™ (PedsQL™) Family Impact Module: cross- cultural adaptation and psychometric evaluation. Health Qual Life Outcomes. 2011 Mar 23;9:16. doi: 10.1186/1477-7525-9-16. PMID: 21429195; PMCID: PMC3072920.

355: Baloira A. Triple terapia en el tratamiento de la EPOC [Triple therapy in chronic obstructive pulmonary disease]. Arch Bronconeumol. 2010;46 Suppl 8:25-30. Spanish. doi: 10.1016/S0300-2896(10)70064-8. PMID: 21334553.

356: El-Hefnawy AS, Wadie BS. Severe stress urinary incontinence: Objective analysis of risk factors. Maturitas. 2011 Apr;68(4):374-7. doi: 10.1016/j.maturitas.2011.01.005. Epub 2011 Feb 2. PMID: 21292413.

357: Peters SP, Kunselman SJ, Icitovic N, Moore WC, Pascual R, Ameredes BT, Boushey HA, Calhoun WJ, Castro M, Cherniack RM, Craig T, Denlinger L, Engle LL, DiMango EA, Fahy JV, Israel E, Jarjour N, Kazani SD, Kraft M, Lazarus SC, Lemanske RF Jr, Lugogo N, Martin RJ, Meyers DA, Ramsdell J, Sorkness CA, Sutherland ER, Szefler SJ, Wasserman SI, Walter MJ, Wechsler ME, Chinchilli VM, Bleecker ER; National Heart, Lung, and Blood Institute Asthma Clinical Research Network. Tiotropium bromide step-up therapy for adults with uncontrolled asthma. N Engl J Med. 2010 Oct 28;363(18):1715-26. doi: 10.1056/NEJMoa1008770. Epub 2010 Sep 19. PMID: 20979471; PMCID: PMC3011177.

358: Malfertheiner P, Selgrad M. Helicobacter pylori infection and current clinical areas of contention. Curr Opin Gastroenterol. 2010 Nov;26(6):618-23. doi: 10.1097/MOG.0b013e32833efede. PMID: 20827182.

359: Rootmensen GN, van Keimpema AR, Jansen HM, de Haan RJ. Predictors of incorrect inhalation technique in patients with asthma or COPD: a study using a validated videotaped scoring method. J Aerosol Med Pulm Drug Deliv. 2010 Oct;23(5):323-8. doi: 10.1089/jamp.2009.0785. PMID: 20804428.

360: Farley MM. 2009 H1N1 influenza: a twenty-first century pandemic with roots in the early twentieth century. Am J Med Sci. 2010 Sep;340(3):202-8. doi: 10.1097/MAJ.0b013e3181e937b0. PMID: 20697263; PMCID: PMC7119454.

361: Barnes PJ. Inhaled corticosteroids in COPD: a controversy. Respiration. 2010;80(2):89-95. doi: 10.1159/000315416. Epub 2010 May 26. PMID: 20501985.

362: Ohar JA, Donohue JF. Mono- and combination therapy of long-acting bronchodilators and inhaled corticosteroids in advanced COPD. Semin Respir Crit Care Med. 2010 Jun;31(3):321-33. doi: 10.1055/s-0030-1254072. Epub 2010 May 21. PMID: 20496301.

363: Williamson PA, Short PM, Clearie KL, Vaidyanathan S, Fardon TC, Howaniec LJ, Lipworth BJ. Paradoxical trough effects of triple therapy with budesonide/formoterol and tiotropium bromide on pulmonary function outcomes in COPD. Chest. 2010 Sep;138(3):595-604. doi: 10.1378/chest.10-0247. Epub 2010 Apr 23. PMID: 20418370.

364: Lemanske RF Jr, Mauger DT, Sorkness CA, Jackson DJ, Boehmer SJ, Martinez FD, Strunk RC, Szefler SJ, Zeiger RS, Bacharier LB, Covar RA, Guilbert TW, Larsen G, Morgan WJ, Moss MH, Spahn JD, Taussig LM; Childhood Asthma Research and Education (CARE) Network of the National Heart, Lung, and Blood Institute. Step-up therapy for children with uncontrolled asthma receiving inhaled corticosteroids. N Engl J Med. 2010 Mar 18;362(11):975-85. doi: 10.1056/NEJMoa1001278. Epub 2010 Mar 2. PMID: 20197425; PMCID: PMC2989902.

365: Simoni-Wastila L, Blanchette CM, Qian J, Yang HW, Zhao L, Zuckerman IH, Pak GH, Silver H, Dalal AA. Burden of chronic obstructive pulmonary disease in Medicare beneficiaries residing in long-term care facilities. Am J Geriatr Pharmacother. 2009 Oct;7(5):262-70. doi: 10.1016/j.amjopharm.2009.11.003. PMID: 19948302.

366: Molfino NA. Increased vagal airway tone in fatal asthma. Med Hypotheses. 2010 Mar;74(3):521-3. doi: 10.1016/j.mehy.2009.10.002. Epub 2009 Nov 10. PMID: 19906493.

367: Gordon E, Lazarus SC. Management of chronic obstructive pulmonary disease: moving beyond the asthma algorithm. J Allergy Clin Immunol. 2009 Nov;124(5):873-80; quiz 881-2. doi: 10.1016/j.jaci.2009.09.040. PMID: 19895979.

368: Jeppsson MC, Lindh CH, Kristiansson MH, Nielsen J, Jönsson BA. Methylhexahydrophthalic anhydride adducted albumin tryptic peptides in nasal lavage fluid. Inhal Toxicol. 2009 Oct;21(12):1013-20. doi: 10.1080/08958370802715997. PMID: 19772480.

369: Zarei S, Jeddi-Tehrani M, Akhondi MM, Zeraati H, Pourheidari F, Ostadkarampour M, Tavangar B, Shokri F. Primary immunization with a triple diphtheria-tetanus-whole cell pertussis vaccine in Iranian infants: an analysis of antibody response. Iran J Allergy Asthma Immunol. 2009 Jun;8(2):85-93. PMID: 19671937.

370: Vilozni D, Livnat G, Dabbah H, Elias N, Hakim F, Bentur L. The potential use of spirometry during methacholine challenge test in young children with respiratory symptoms. Pediatr Pulmonol. 2009 Jul;44(7):720-7. doi: 10.1002/ppul.20978. PMID: 19499592.

371: Fleischel O, Giménez-Arnau E, Lepoittevin JP. Nuclear magnetic resonance studies on covalent modification of amino acids thiol and amino residues by monofunctional aryl 13C-isocyanates, models of skin and respiratory sensitizers: transformation of thiocarbamates into urea adducts. Chem Res Toxicol. 2009 Jun;22(6):1106-15. doi: 10.1021/tx9000539. PMID: 19405514.

372: Goplen N, Karim MZ, Liang Q, Gorska MM, Rozario S, Guo L, Alam R. Combined sensitization of mice to extracts of dust mite, ragweed, and Aspergillus species breaks through tolerance and establishes chronic features of asthma. J Allergy Clin Immunol. 2009 Apr;123(4):925-32.e11. doi: 10.1016/j.jaci.2009.02.009. PMID: 19348928; PMCID: PMC2683988.

373: Lemmens KM, Nieboer AP, Huijsman R. A systematic review of integrated use of disease-management interventions in asthma and COPD. Respir Med. 2009 May;103(5):670-91. doi: 10.1016/j.rmed.2008.11.017. Epub 2009 Jan 19. PMID: 19155168.

374: Sun RS, Chen XH, Sui JF, Liu RQ, Cheng TM, Ran XZ, Yang T. Detecting anti- FcepsilonRI autoantibodies in patients with asthma by flow cytometry. J Int Med Res. 2008 Nov-Dec;36(6):1214-9. doi: 10.1177/147323000803600607. PMID: 19094429.

375: Shah S, Roydhouse JK, Sawyer SM. Medical students go back to school--the Triple A journey. Aust Fam Physician. 2008 Nov;37(11):952-4. PMID: 19037472.

376: Maffey AF, Venialgo CM, Barrero PR, Fuse VA, Márques Mde L, Saia M, Villalba A, Teper AM, Mistchenko AS. Nuevos virus respiratorios en niños de 2 meses a 3 años con sibilancias recurrentes [New respiratory viruses in children 2 months to 3 years old with recurrent wheeze]. Arch Argent Pediatr. 2008 Aug;106(4):302-9. Spanish. doi: 10.1590/S0325-00752008000400005. PMID: 18766276.

377: Tsuchida H, Takahashi S, Nosaka E, Kuraya T, Yamashita M, Morimoto K. Novel triple neurokinin receptor antagonist CS-003 inhibits respiratory disease models in guinea pigs. Eur J Pharmacol. 2008 Oct 31;596(1-3):153-9. doi: 10.1016/j.ejphar.2008.07.046. Epub 2008 Jul 31. PMID: 18706408.

378: Kumon M, Yabe Y, Kasuya Y, Suzuki M, Kusai A, Yonemochi E, Terada K. Applicability of DPI formulations for novel neurokinin receptor antagonist. Int J Pharm. 2008 May 22;356(1-2):102-9. doi: 10.1016/j.ijpharm.2007.12.044. Epub 2008 Jan 9. PMID: 18294787.

379: Rootmensen GN, van Keimpema AR, Looysen EE, van der Schaaf L, Jansen HM, de Haan RJ. Reliability in the assessment of videotaped inhalation technique. J Aerosol Med. 2007 Winter;20(4):429-33. doi: 10.1089/jam.2007.0623. PMID: 18158715.

380: Sharif S, Goldberg B. Detection of IgE antibodies to bacitracin using a commercially available streptavidin-linked solid phase in a patient with anaphylaxis to triple antibiotic ointment. Ann Allergy Asthma Immunol. 2007 Jun;98(6):563-6. doi: 10.1016/S1081-1206(10)60736-3. PMID: 17601270. 381: Venkatasamy R, Spina D. Protease inhibitors in respiratory disease: focus on asthma and chronic obstructive pulmonary disease. Expert Rev Clin Immunol. 2007 May;3(3):365-81. doi: 10.1586/1744666X.3.3.365. PMID: 20477680.

382: Matsumoto K, Inoue H, Tsuda M, Nakano T, Komori M, Fukuyama S, Nakanishi Y. Different profiles of IL-10+IFN-gamma-IL-4-CD4+ T cells in the peripheral blood in atopic and non-atopic asthmatics. Respiration. 2008;75(3):281-7. doi: 10.1159/000101475. Epub 2007 Mar 29. PMID: 17396024.

383: Hakim F, Vilozni D, Adler A, Livnat G, Tal A, Bentur L. The effect of montelukast on bronchial hyperreactivity in preschool children. Chest. 2007 Jan;131(1):180-6. doi: 10.1378/chest.06-1402. PMID: 17218573.

384: Bernstein DI, Wang N, Campo P, Chakraborty R, Smith A, Cartier A, Boulet LP, Malo JL, Yucesoy B, Luster M, Tarlo SM, Hershey GK. Diisocyanate asthma and gene-environment interactions with IL4RA, CD-14, and IL-13 genes. Ann Allergy Asthma Immunol. 2006 Dec;97(6):800-6. doi: 10.1016/S1081-1206(10)60972-6. PMID: 17201240.

385: Fardon T, Haggart K, Lee DK, Lipworth BJ. A proof of concept study to evaluate stepping down the dose of fluticasone in combination with salmeterol and tiotropium in severe persistent asthma. Respir Med. 2007 Jun;101(6):1218-28. doi: 10.1016/j.rmed.2006.11.001. Epub 2006 Dec 18. PMID: 17178217.

386: Pahl A, Bauhofer A, Petzold U, Cnota PJ, Maus J, Brune K, Szelenyi S. Synergistic effects of the anti-cholinergic R,R-glycopyrrolate with anti- inflammatory drugs. Biochem Pharmacol. 2006 Dec 15;72(12):1690-6. doi: 10.1016/j.bcp.2006.07.025. Epub 2006 Sep 25. PMID: 16996482.

387: Herszberg B, Ramos-Barbón D, Tamaoka M, Martin JG, Lavoie JP. Heaves, an asthma-like equine disease, involves airway smooth muscle remodeling. J Allergy Clin Immunol. 2006 Aug;118(2):382-8. doi: 10.1016/j.jaci.2006.03.044. Epub 2006 May 30. PMID: 16890762.

388: Currie GP, Lee DK, Menzies D, Lipworth BJ. Evaluating the effects of "triple therapy" with inhaled corticosteroids, long-acting beta2-agonists, and leukotriene modifiers in asthma. Chest. 2006 Jul;130(1):301-2. doi: 10.1378/chest.130.1.301. PMID: 16840420.

389: Larsen K, Macleod D, Nihlberg K, Gürcan E, Bjermer L, Marko-Varga G, Westergren-Thorsson G. Specific haptoglobin expression in bronchoalveolar lavage during differentiation of circulating fibroblast progenitor cells in mild asthma. J Proteome Res. 2006 Jun;5(6):1479-83. doi: 10.1021/pr050462h. PMID: 16739999.

390: Abe M, Hayashi Y, Murai A, Shibata K, Sakata N, Igarashi R, Katsuragi T, Tanaka K. Effects of inducible nitric oxide synthase inhibitors on asthma depending on administration schedule. Free Radic Biol Med. 2006 Mar 15;40(6):1083-95. doi: 10.1016/j.freeradbiomed.2005.10.057. Epub 2005 Nov 21. PMID: 16540403.

391: De Swert KO, Joos GF. Extending the understanding of sensory neuropeptides. Eur J Pharmacol. 2006 Mar 8;533(1-3):171-81. doi: 10.1016/j.ejphar.2005.12.066. Epub 2006 Feb 7. PMID: 16464447.

392: Kritikos V, Saini B, Bosnic-Anticevich SZ, Krass I, Shah S, Taylor S, Armour C. Innovative asthma health promotion by rural community pharmacists: a feasibility study. Health Promot J Austr. 2005 Apr;16(1):69-73. doi: 10.1071/he05069. PMID: 16389935.

393: Schelfhout V, Louis R, Lenz W, Heyrman R, Pauwels R, Joos G. The triple neurokinin-receptor antagonist CS-003 inhibits neurokinin A-induced bronchoconstriction in patients with asthma. Pulm Pharmacol Ther. 2006;19(6):413-8. doi: 10.1016/j.pupt.2005.10.007. Epub 2005 Dec 20. PMID: 16364669.

394: Robbins RA, Thomas AR, Proctor LM, Hoyt JC, Hayden JM. Heat decreases formoterol delivery. Chest. 2005 Dec;128(6):4036-40. doi: 10.1378/chest.128.6.4036. PMID: 16354878.

395: Rice-McDonald G, Bowler S, Staines G, Mitchell C. Doubling daily inhaled corticosteroid dose is ineffective in mild to moderately severe attacks of asthma in adults. Intern Med J. 2005 Dec;35(12):693-8. doi: 10.1111/j.1445-5994.2005.00972.x. PMID: 16313543.

396: Montuschi P, Martello S, Felli M, Mondino C, Barnes PJ, Chiarotti M. Liquid chromatography/mass spectrometry analysis of exhaled leukotriene B4 in asthmatic children. Respir Res. 2005 Oct 19;6(1):119. doi: 10.1186/1465-9921-6-119. PMID: 16236169; PMCID: PMC1283153.

397: Chan HW, Smith NJ, Hannan RD, Thomas WG. Tackling the EGFR in pathological tissue remodelling. Pulm Pharmacol Ther. 2006;19(1):74-8. doi: 10.1016/j.pupt.2005.04.005. Epub 2005 Jun 24. PMID: 15979363.

398: Khanna S, Sobhia ME, Bharatam PV. Additivity of molecular fields: CoMFA study on dual activators of PPARalpha and PPARgamma. J Med Chem. 2005 Apr 21;48(8):3015-25. doi: 10.1021/jm049383s. PMID: 15828840.

399: Wei H, Zhang J, Xiao W, Feng J, Sun R, Tian Z. Involvement of human natural killer cells in asthma pathogenesis: natural killer 2 cells in type 2 cytokine predominance. J Allergy Clin Immunol. 2005 Apr;115(4):841-7. doi: 10.1016/j.jaci.2004.11.026. PMID: 15806008.

400: Benke G, Abramson M, Raven J, Thien FC, Walters EH. Asthma and vaccination history in a young adult cohort. Aust N Z J Public Health. 2004 Aug;28(4):336-8. doi: 10.1111/j.1467-842x.2004.tb00440.x. PMID: 15704697.

401: Meltzer EO, Berman GD, Corren J, Pedinoff AJ, Doyle G, Waksman JA, Butkerait P, Cooper SA, Berlin RG, Wason S. Addition of ibuprofen to pseudoephedrine and chlorpheniramine in the treatment of seasonal allergic rhinitis. Ann Allergy Asthma Immunol. 2004 Nov;93(5):452-9. doi: 10.1016/S1081-1206(10)61412-3. PMID: 15562884.

402: Murai A, Abe M, Hayashi Y, Sakata N, Katsuragi T, Tanaka K. Comparison study between the mechanisms of allergic asthma amelioration by a cysteinyl- leukotriene type 1 receptor antagonist montelukast and methylprednisolone. J Pharmacol Exp Ther. 2005 Feb;312(2):432-40. doi: 10.1124/jpet.104.074922. Epub 2004 Oct 6. PMID: 15470084.

403: Lee CG, Cho SJ, Kang MJ, Chapoval SP, Lee PJ, Noble PW, Yehualaeshet T, Lu B, Flavell RA, Milbrandt J, Homer RJ, Elias JA. Early growth response gene 1-mediated apoptosis is essential for transforming growth factor beta1-induced pulmonary fibrosis. J Exp Med. 2004 Aug 2;200(3):377-89. doi: 10.1084/jem.20040104. PMID: 15289506; PMCID: PMC2211975.

404: Hallgren J, Bäckström S, Estrada S, Thuveson M, Pejler G. Histidines are critical for heparin-dependent activation of mast cell tryptase. J Immunol. 2004 Aug 1;173(3):1868-75. doi: 10.4049/jimmunol.173.3.1868. PMID: 15265919.

405: Goleva E, Dunlap A, Leung DY. Differential control of TH1 versus TH2 cell responses by the combination of low-dose steroids with beta2-adrenergic agonists. J Allergy Clin Immunol. 2004 Jul;114(1):183-91. doi: 10.1016/j.jaci.2004.04.001. PMID: 15241363.

406: Aaronson DW, Gandhi TK. Incorrect allergy injections: allergists' experiences and recommendations for prevention. J Allergy Clin Immunol. 2004 Jun;113(6):1117-21. doi: 10.1016/j.jaci.2004.01.756. PMID: 15208593.

407: Soni KK, Khare ML, Saxena RC. Spasmolytic activity of a herbal drug isolated from Tephrosia purpurea in guinea pigs. Anc Sci Life. 2004 Apr;23(4):59-65. PMID: 22557142; PMCID: PMC3330980.

408: Rimaniol AC, Till SJ, Garcia G, Capel F, Godot V, Balabanian K, Durand- Gasselin I, Varga EM, Simonneau G, Emilie D, Durham SR, Humbert M. The CX3C chemokine fractalkine in allergic asthma and rhinitis. J Allergy Clin Immunol. 2003 Dec;112(6):1139-46. doi: 10.1016/j.jaci.2003.09.041. PMID: 14657873.

409: Flores G, Abreu M, Chaisson CE, Sun D. Keeping children out of hospitals: parents' and physicians' perspectives on how pediatric hospitalizations for ambulatory care-sensitive conditions can be avoided. Pediatrics. 2003 Nov;112(5):1021-30. doi: 10.1542/peds.112.5.1021. PMID: 14595041.

410: Köhler D. Novolizer: the new technology for the management of asthma therapy. Curr Opin Pulm Med. 2003 Apr;9 Suppl 1:S11-6. PMID: 12974537.

411: Rizzo CA, Anthes JC, Corboz MR, Chapman RW, Shih NY, Reichard GA, Ng KJ, Hey JA. Development and potential utility of dual and triple NK receptor antagonists. Curr Top Med Chem. 2003;3(12):1410-22. doi: 10.2174/1568026033451844. PMID: 12871172.

412: Rodrigo GJ, Rodrigo C. Triple inhaled drug protocol for the treatment of acute severe asthma. Chest. 2003 Jun;123(6):1908-15. doi: 10.1378/chest.123.6.1908. PMID: 12796167.

413: Joos GF, De Swert KO, Schelfhout V, Pauwels RA. The role of neural inflammation in asthma and chronic obstructive pulmonary disease. Ann N Y Acad Sci. 2003 May;992:218-30. doi: 10.1111/j.1749-6632.2003.tb03152.x. PMID: 12794061.

414: Cazzola M, Noschese P, Salzillo A, Piccolo A. Asthma treatment must be always tailored to the individual patient. Monaldi Arch Chest Dis. 2002 Jun- Aug;57(3-4):213-7. PMID: 12619388.

415: Bradshaw D, Schneider M, Dorrington R, Bourne DE, Laubscher R. South African cause-of-death profile in transition--1996 and future trends. S Afr Med J. 2002 Aug;92(8):618-23. PMID: 12244621.

416: Zhu Z, Lee CG, Zheng T, Chupp G, Wang J, Homer RJ, Noble PW, Hamid Q, Elias JA. Airway inflammation and remodeling in asthma. Lessons from interleukin 11 and interleukin 13 transgenic mice. Am J Respir Crit Care Med. 2001 Nov 15;164(10 Pt 2):S67-70. doi: 10.1164/ajrccm.164.supplement_2.2106070. PMID: 11734470.

417: Abe M, Shibata K, Akatsu H, Shimizu N, Sakata N, Katsuragi T, Okada H. Contribution of anaphylatoxin C5a to late airway responses after repeated exposure of antigen to allergic rats. J Immunol. 2001 Oct 15;167(8):4651-60. doi: 10.4049/jimmunol.167.8.4651. PMID: 11591795.

418: Fyrnys B, Stang N, Wolf-Heuss E. Stability and performance characteristics of a budesonide powder for inhalation with a novel dry powder inhaler device. Curr Opin Pulm Med. 2001 Apr;7 Suppl 1:S7-11. PMID: 11385814.

419: Dahl M, Nordestgaard BG, Lange P, Tybjaerg-Hansen A. Fifteen-year follow-up of pulmonary function in individuals heterozygous for the cystic fibrosis phenylalanine-508 deletion. J Allergy Clin Immunol. 2001 May;107(5):818-23. doi: 10.1067/mai.2001.114117. PMID: 11344348.

420: Dubé J, Chakir J, Dubé C, Grimard Y, Laviolette M, Boulet LP. Synergistic action of endothelin (ET)-1 on the activation of bronchial fibroblast isolated from normal and asthmatic subjects. Int J Exp Pathol. 2000 Dec;81(6):429-37. doi: 10.1046/j.1365-2613.2000.00173.x. PMID: 11298190; PMCID: PMC2517744.

421: Shah S, Peat JK, Mazurski EJ, Wang H, Sindhusake D, Bruce C, Henry RL, Gibson PG. Effect of peer led programme for asthma education in adolescents: cluster randomised controlled trial. BMJ. 2001 Mar 10;322(7286):583-5. doi: 10.1136/bmj.322.7286.583. PMID: 11238152; PMCID: PMC26550.

422: Danckwerts MP. Optimization and development of a core-in-cup tablet for modulated release of theophylline in simulated gastrointestinal fluids. Drug Dev Ind Pharm. 2000 Jul;26(7):767-72. doi: 10.1081/ddc-100101296. PMID: 10872096.

423: Sacchi S, Kantarjian HM, Freireich EJ, O'Brien S, Cortes J, Rios MB, Kornblau S, Giles FJ, Koller C, Gajewski J, Talpaz M. Unexpected high incidence of severe toxicities associated with alpha interferon, low-dose cytosine arabinoside and all-trans retinoic acid in patients with chronic myelogenous leukemia. Leuk Lymphoma. 1999 Nov;35(5-6):483-9. doi: 10.1080/10428199909169612. PMID: 10609785.

424: Salmon M, Walsh DA, Koto H, Barnes PJ, Chung KF. Repeated allergen exposure of sensitized Brown-Norway rats induces airway cell DNA synthesis and remodelling. Eur Respir J. 1999 Sep;14(3):633-41. doi: 10.1034/j.1399-3003.1999.14c25.x. PMID: 10543287.

425: Baraniuk J, Murray JJ, Nathan RA, Berger WE, Johnson M, Edwards LD, Srebro S, Rickard KA. Fluticasone alone or in combination with salmeterol vs triamcinolone in asthma. Chest. 1999 Sep;116(3):625-32. doi: 10.1378/chest.116.3.625. PMID: 10492263.

426: Li JT, Goldstein MF, Gross GN, Noonan MJ, Weisberg S, Edwards L, Reed KD, Rogenes PR. Effects of fluticasone propionate, triamcinolone acetonide, prednisone, and placebo on the hypothalamic-pituitary-adrenal axis. J Allergy Clin Immunol. 1999 Apr;103(4):622-9. doi: 10.1016/s0091-6749(99)70234-4. PMID: 10200011.

427: Golish J, Curtis-McCarthy P, McCarthy K, Kavuru M, Wagner W, Beck G, Eng P. Albuterol delivered by metered-dose inhaler (MDI), MDI with spacer, and Rotahaler device--a comparison of efficacy and safety. J Asthma. 1998;35(4):373-9. doi: 10.3109/02770909809075671. PMID: 9669832.

428: Gibson PG, Shah S, Mamoon HA. Peer-led asthma education for adolescents: impact evaluation. J Adolesc Health. 1998 Jan;22(1):66-72. doi: 10.1016/S1054-139X(97)00203-6. PMID: 9436069.

429: Tibes U, Friebe WG. Phospholipase A2 inhibitors in development. Expert Opin Investig Drugs. 1997 Mar;6(3):279-98. doi: 10.1517/13543784.6.3.279. PMID: 15989628.

430: Piletta PA, Wirth S, Hommel L, Saurat JH, Hauser C. Circulating skin-homing T cells in atopic dermatitis. Selective up-regulation of HLA-DR, interleukin-2R, and CD30 and decrease after combined UV-A and UV-B phototherapy. Arch Dermatol. 1996 Oct;132(10):1171-6. doi: 10.1001/archderm.132.10.1171. PMID: 8859027.

431: Spong CY, Sherer DM, Ghidini A, Jenkins CB, Seydel FD, Eglinton GS. Second- trimester amniotic fluid or maternal serum interleukin-10 levels and small for gestational age neonates. Obstet Gynecol. 1996 Jul;88(1):24-8. doi: 10.1016/0029-7844(96)00110-X. PMID: 8684756.

432: Li YQ, Yuan W, Zhang SL. [Clinical and experimental study of xiao er ke cuan ling oral liquid in the treatment of infantile bronchopneumonia]. Zhongguo Zhong Xi Yi Jie He Za Zhi. 1992 Dec;12(12):719-21, 737, 708. Chinese. PMID: 1304839.

433: Vichyanond P, Chokephaibulkit K, Kerdsomnuig S, Visitsuntorn N, Tuchinda M. Clinical evaluation of the "Siriraj Spacer" in asthmatic Thai children. Ann Allergy. 1992 Nov;69(5):433-8. PMID: 1456485.

434: Iamandescu IB. NSAIDs-induced asthma: peculiarities related to background and association with other drug or non-drugs etiological agents. Allergol Immunopathol (Madr). 1989 Nov-Dec;17(6):285-90. PMID: 2635829.

435: Findeisen DG. Unter Stress leiden oder Stress geniessen? Methodik und Ergebnisse einer klinisch bewährten Antistress-Dreiklang-Strategie am Beispiel der Asthmakrankheit [Suffering from stress or enjoying stress? Method and results of a clinically successful anti-stress triple strategy exemplified by asthma]. Fortschr Med. 1989 Mar 30;107(10):72-3. German. PMID: 2714726.

436: Henry DA. Side-effects of non-steroidal anti-inflammatory drugs. Baillieres Clin Rheumatol. 1988 Aug;2(2):425-54. doi: 10.1016/s0950-3579(88)80021-9. PMID: 3066501.

437: van der Vet AP, Kreukniet J, van Drost RH, Maes RA, Fokkens JK, Hamelink MJ. Combination therapy of theophylline and terbutaline as sustained-release preparations in patients with asthmatic bronchitis. Int J Clin Pharmacol Ther Toxicol. 1987 Oct;25(10):558-64. PMID: 2828249.

438: Conradson TB, Eklundh G, Olofsson B, Pahlm O, Persson G. Arrhythmogenicity from combined bronchodilator therapy in patients with obstructive lung disease and concomitant ischemic heart disease. Chest. 1987 Jan;91(1):5-9. doi: 10.1378/chest.91.1.5. PMID: 2431838.

439: Tønnesen P. Intracutaneous and skin prick testing with serotonin and histamine. Allergy. 1986 Apr;41(3):196-202. doi: 10.1111/j.1398-9995.1986.tb00300.x. PMID: 3717531.

440: Kraemer R, Meister B. Fast real-time moment-ratio analysis of multibreath nitrogen washout in children. J Appl Physiol (1985). 1985 Oct;59(4):1137-44. doi: 10.1152/jappl.1985.59.4.1137. PMID: 4055593.

441: Fisher AA. The persulfates: a triple threat. Cutis. 1985 Jun;35(6):520, 523-5. PMID: 4017646.

442: Giles GG, Lickiss N, Gibson HB, Shaw K. Respiratory symptoms in Tasmanian adolescents: a follow up of the 1961 birth cohort. Aust N Z J Med. 1984 Oct;14(5):631-7. doi: 10.1111/j.1445-5994.1984.tb05015.x. PMID: 6597710.

443: Khil'ko TF. Reaktsiia troĭnogo rozetkoobrazovaniia--novyĭ metod otsenki kletochnykh mekhanizmov immuniteta pri vozdeĭstvii faktorov proizvodst-vennoĭ sredy [The triple rosette formation reaction--a new method for assessing the mechanisms of cellular immunity during exposure to factors in the industrial environment]. Gig Tr Prof Zabol. 1984 Sep;(9):20-3. Russian. PMID: 6334007.

444: Rebuck AS, Gent M, Chapman KR. Anticholinergic and sympathomimetic combination therapy of asthma. J Allergy Clin Immunol. 1983 Mar;71(3):317-23. doi: 10.1016/0091-6749(83)90086-6. PMID: 6219156.

445: Lefcoe NM, Toogood JH, Blennerhassett G, Baskerville J, Paterson NA. The addition of an aerosol anticholinergic to an oral beta agonist plus theophylline in asthma and bronchitis. A double-blind single dose study. Chest. 1982 Sep;82(3):300-5. doi: 10.1378/chest.82.3.300. PMID: 6213382.

446: Grimwood K, Johnson-Barrett JJ, Taylor B. Salbutamol: tablets, inhalational powder, or nebuliser? Br Med J (Clin Res Ed). 1981 Jan 10;282(6258):105-6. doi: 10.1136/bmj.282.6258.105. PMID: 6779890; PMCID: PMC1503918.

447: Tripathi RM, Sen PC, Das PK. Studies on the mechanism of action of Albizzia lebbeck, an Indian indigenous drug used in the treatment of atopic allergy. J Ethnopharmacol. 1979 Dec;1(4):385-96. doi: 10.1016/s0378-8741(79)80003-3. PMID: 544953.

448: Muittari A, Mattila MJ. Objective and subjective assessment of ephedrine combinations in asthmatic outpatients. Ann Clin Res. 1979 Jun;11(3):87-9. PMID: 386912.

449: Cohen BM. Physiologic/clinical comparisons of a sustained-release decongestant combination, its components and placebo in patients with allergic rhinitis. J Asthma Res. 1975 Sep;13(1):7-13. doi: 10.3109/02770907509104153. PMID: 57959.

450: Abramson HA. Triple blind disaster. J Asthma Res. 1965 Sep;3(1):1-2. PMID: 5318624.

451: GOLDFARB AA, ROMANOFF A. Clinical evaluation of a new triple drug aerosol for asthma. Ann Allergy. 1962 May;20:307-14. PMID: 13899746.
